# Supplementary material for: Ligand-switching and counteranion-induced hierarchical self-assembly of silver-NHC complexes
Source: Royal Society of Chemistry journal article supplement (doi:10.1039/c1sc00615k), 2011-10-05

# Ligand-Switching and Counteranion-Induced Hierarchical Self-Assembly of Silver-NHC Complexes

Siping Wei, Xiyu Li, Zhuang Yang, Jingbo Lan, Ge Gao, Ying Xue, and Jingsong You\*

*Key Laboratory of Green Chemistry and Technology of Ministry of Education, College of Chemistry, and State Key Laboratory of Biotherapy, West China Hospital, West China Medical School, Sichuan University, 29 Wangjiang Road, Chengdu 610064 (PR China)*

*Fax: 86-28-85412203; E-mail: jsyou@scu.edu.cn*

## Supporting Information

### Table of contents

|                                                                                                                                                                                                                                                                                                                                                                                                                                                                                                        |     |
|--------------------------------------------------------------------------------------------------------------------------------------------------------------------------------------------------------------------------------------------------------------------------------------------------------------------------------------------------------------------------------------------------------------------------------------------------------------------------------------------------------|-----|
| I. General Remarks .....                                                                                                                                                                                                                                                                                                                                                                                                                                                                               | S2  |
| II. Data of (R)-2·2HCl.....                                                                                                                                                                                                                                                                                                                                                                                                                                                                            | S3  |
| III. Preparation and characterisation of silver- and gold-NHC complexes.....                                                                                                                                                                                                                                                                                                                                                                                                                           | S3  |
| IV. Crystal parameters and refinement results of [(R)-1·Ag] <sub>2</sub> (PF <sub>6</sub> ) <sub>2</sub> , [(R)-1·Ag] <sub>2</sub> (BF <sub>4</sub> )(Cl), [(S)-2·Ag] <sub>3</sub> (PF <sub>6</sub> ) <sub>3</sub> , [(S)-2·Ag] <sub>3</sub> (BF <sub>4</sub> ) <sub>3</sub> , [(S)-2·Au] <sub>3</sub> (BF <sub>4</sub> ) <sub>3</sub> , [(R)-2·Ag] <sub>3</sub> (BF <sub>4</sub> ) <sub>3</sub> , and [(S)-3·Ag] <sub>3</sub> (PF <sub>6</sub> ) <sub>2</sub> (Cl)·(CHCl <sub>3</sub> )·(EtOAc) ..... | S18 |
| V. Circular dichroism (CD) spectrum investigation of the silver NHC complexes.....                                                                                                                                                                                                                                                                                                                                                                                                                     | S19 |
| VI. <sup>1</sup> H NMR spectral changes of [(S)-2·Ag] <sub>3</sub> (BF <sub>4</sub> ) <sub>3</sub> upon addition of 10 equiv TBACl in CDCl <sub>3</sub> .....                                                                                                                                                                                                                                                                                                                                          | S20 |
| VII. Influence of the counteranions of [(S)-2·Ag] <sub>3</sub> (X) <sub>3</sub> on the hierarchical self-assemblies.....                                                                                                                                                                                                                                                                                                                                                                               | S20 |
| VIII. Morphology analysis of [(S)-2·Ag] <sub>3</sub> (X) <sub>3</sub> (X = BF <sub>4</sub> , Cl and/or AgCl <sub>2</sub> , CH <sub>3</sub> CO <sub>2</sub> , CF <sub>3</sub> CO <sub>2</sub> ) .....                                                                                                                                                                                                                                                                                                   | S21 |
| IX. <sup>1</sup> H NMR spectrum studies of [(S)-2·Ag] <sub>3</sub> (X) <sub>3</sub> (X = BF <sub>4</sub> , Cl and/or AgCl <sub>2</sub> , CH <sub>3</sub> CO <sub>2</sub> , CF <sub>3</sub> CO <sub>2</sub> ) .....                                                                                                                                                                                                                                                                                     | S21 |
| X. References.....                                                                                                                                                                                                                                                                                                                                                                                                                                                                                     | S22 |
| XI. Copies of <sup>1</sup> H, <sup>13</sup> C, and <sup>19</sup> F NMR spectra .....                                                                                                                                                                                                                                                                                                                                                                                                                   | S23 |

## I. General Remarks

$^1\text{H}$  NMR spectra were obtained with a Bruker AV II-400 (400 MHz), a Varian Inova-400 (400 MHz) or a Bruker AV II-600 (600 MHz) spectrometer, while  $^{13}\text{C}$  NMR spectra were recorded with a Bruker AV II-400 (100 MHz) or a Bruker AV II-600 (150 MHz) spectrometer.  $^{19}\text{F}$  NMR spectra were recorded with a Bruker AV II-400 (376 MHz) spectrometer. ROESY and HMQC NMR spectra were obtained with a Bruker AV II-400 (400 MHz) spectrometer. The  $^1\text{H}$  and  $^{13}\text{C}$  NMR chemical shifts were recorded with TMS,  $\text{CDCl}_3$ ,  $\text{DMSO}-d_6$ , or  $\text{CD}_3\text{COCD}_3$  as the internal standard. Elemental analyses were performed with a Euro EA 3000 instrument. Mass spectra were obtained on a Waters Quattro Premier XE Mass spectrometer or a Finnigan-LCQDECA instrument. The ESI-TOF mass spectra were recorded with a Waters Q-Tof premier instrument. Transmission electron microscopy (TEM) studies were carried out on a Tecnai G2 F20 S-TWIN, operating at 200 kV, or a HITACHI H-600, operating at 75 kV. Scanning transmission electron microscope (STEM) studies were carried out on a Tecnai G2 F20 S-TWIN, operating at 200 kV. Circular Dichroism (CD) spectra were recorded on an Aviv Model 215 Circular Dichroism Spectrometer at 25 °C.

X-Ray single-crystal diffraction data were collected on an Oxford Diffraction Xcalibur Eos Gemini Diffractometer with graphite monochromated  $\text{Mo K}\alpha$  radiation ( $\lambda = 0.7107 \text{ \AA}$ ) with  $\omega$  scan mode. Empirical absorption correction using spherical harmonics was implemented in SCALE3 ABSPACK scaling algorithm. All the structures were solved by direct methods using the SHELXS SHELXS-97 program and refined by full-matrix least-squares methods with SHELXL-97.<sup>1</sup> All non-hydrogen atoms were located in successive difference Fourier syntheses and refined with anisotropic thermal parameters on  $\text{F}^2$ . Hydrogen atoms were included in calculated positions and refined with constrained thermal parameters riding on their parent atoms. Drawings were produced with Ortep, Diamod, and OLEX2.<sup>2</sup>

Unless otherwise noted, all reagents were obtained from commercial suppliers and used without further purification. Unless otherwise indicated, all syntheses and manipulations were carried out under dry inert atmosphere. (*R*)-**1**·2HCl, (*S*)-**2**·2HCl, (*R*)-**2**·2HCl, and (*S*)-**3**·2HCl were prepared according to our previous report.<sup>3</sup>

## II. Data of (*R*)-2·2HCl

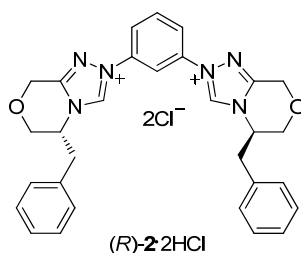

### 1,3-Bis{(*R*)-5-benzyl-6,8-dihydro-5H-[1,4]oxazino[2,1-c]-[1,2,4]triazol-2-ium-2-yl}benzene

**dichloride (*R*)-2·2HCl.** The compound (*R*)-2·2HCl was prepared according to our previous report.<sup>3</sup> m.p > 300 °C.  $[\alpha]_D^{20}$ : -0.48 cm<sup>3</sup> g<sup>-1</sup> dm<sup>-1</sup> (c = 0.50 in CH<sub>3</sub>OH). <sup>1</sup>H NMR (400 MHz, DMSO-*d*<sub>6</sub>): δ 3.18 (dd, *J* = 10.4 Hz, 10.4 Hz, 2H), 3.56 (dd, *J* = 4.4 Hz, 4.4 Hz, 2H), 3.95-4.04 (m, 4H), 4.92-4.95 (m, 2H), 5.20 (dd, *J* = 16.4 Hz, 16.4 Hz, 4H), 7.39-7.45 (m, 10H), 8.10 (t, *J* = 8.0 Hz, 1H), 8.21-8.23 (m, 2H), 8.56 (s, 1H), 11.34 (s, 2H) ppm. <sup>13</sup>C NMR (150 MHz, DMSO-*d*<sub>6</sub>): 37.9, 57.0, 61.9, 65.5, 113.3, 122.5, 128.0, 129.5, 129.9, 133.0, 135.4, 136.5, 136.6, 142.3, 150.6 ppm. HR-MS (ESI) calcd for [M - Cl]<sup>+</sup>: 541.2117, found. 541.2119. Anal. Calcd for C<sub>30</sub>H<sub>30</sub>Cl<sub>2</sub>N<sub>6</sub>O<sub>2</sub>: C, 62.39; H, 5.24; N, 14.55; Found: C, 62.61; H, 5.51; N, 14.39.

## III. Preparation and characterization of silver- and gold-NHC complexes

### 1. Preparation and characterization of [(*R*)-1·Ag]<sub>2</sub>(BF<sub>4</sub>)(Cl)

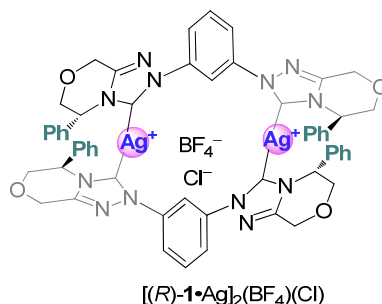

Bis-triazolium salt (*R*)-1·2HCl (110 mg, 0.2 mmol), silver oxide (46 mg, 0.2 mmol), and NaBF<sub>4</sub> (24 mg, 0.22 mmol) were added to CH<sub>2</sub>Cl<sub>2</sub> (5 mL) under argon. The mixture became gray after being stirred for 10 h at room temperature, and the solvent was then removed in vacuo at room temperature to give a gray solid, followed by extraction with hot DMSO (2~3 mL). The colorless

crystalline product was prepared by slow diffusion of ethyl ether into the solution of crude product in DMSO at room temperature in *ca.* 80 % yield. Colorless block crystals  $[(R)\text{-}\mathbf{1}\cdot\text{Ag}]_2(\text{BF}_4)(\text{Cl})$  suitable for X-ray analysis were obtained by slow diffusion of ethyl ether into the DMSO solution at ambient temperature through several days.  $^1\text{H}$  NMR (400 MHz,  $\text{DMSO-}d_6$ ):  $\delta$  3.97 (dd,  $J = 6.0$  Hz, 6.0 Hz, 4H), 4.32 (dd,  $J = 4.4$  Hz, 4.4 Hz, 4H), 5.23 (d,  $J = 15.6$  Hz, 4H), 5.40 (d,  $J = 16.0$  Hz, 4H), 5.94 (s, 4H), 6.47 (t,  $J = 7.2$  Hz, 4H), 6.56 (t,  $J = 7.2$  Hz, 8H), 6.96 (d,  $J = 7.2$  Hz, 8H), 7.44 (s, 2H), 7.88 (t,  $J = 8.4$  Hz, 2H), 8.00 (d,  $J = 8.0$  Hz, 4H) ppm.  $^{13}\text{C}$  NMR (100 MHz,  $\text{DMSO-}d_6$ ):  $\delta$  59.0, 62.3, 69.7, 110.5, 121.8, 127.6, 128.1, 128.6, 131.9, 137.9, 139.2, 150.6, 178.7 (dd,  $^1J^{107}\text{Ag} = 189.4$  Hz,  $^1J^{109}\text{Ag} = 214.2$  Hz, carbene N-C-N) ppm.  $^{19}\text{F}$  NMR (376 MHz,  $\text{DMSO-}d_6$ ):  $\delta$  -148.2 (s,  $\text{BF}_4^-$ ) ppm. Anal. Calcd for  $\text{C}_{56}\text{H}_{48}\text{Ag}_2\text{BClF}_4\text{N}_{12}\text{O}_4$ : C, 52.10; H, 3.75; N, 13.02; Found: C, 51.87; H, 4.03; N, 12.71. ESI-TOF found:  $m/z = 583.10$  (calcd for  $[(R)\text{-}\mathbf{1}\cdot\text{Ag}]^+$  583.10);  $m/z = 1203.17$  (calcd for  $[(R)\text{-}\mathbf{1}\cdot\text{Ag}]_2\text{Cl}^+$  1203.17);  $m/z = 1255.20$  (calcd for  $[(R)\text{-}\mathbf{1}\cdot\text{Ag}]_2(\text{BF}_4)^+$  1255.19).

## 2. Preparation and characterization of $[(R)\text{-}\mathbf{1}\cdot\text{Ag}]_2(\text{PF}_6)_2$

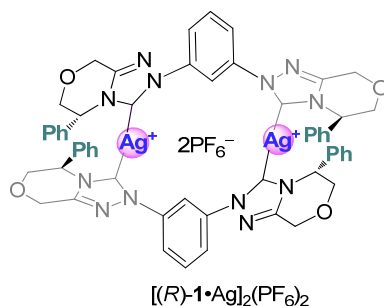

Bis-triazolium salt  $(R)\text{-}\mathbf{1}\cdot 2\text{HCl}$  (110 mg, 0.2 mmol), silver oxide (46 mg, 0.2 mmol), and  $\text{KPF}_6$  (40.5 mg, 0.22 mmol) were added to  $\text{CH}_2\text{Cl}_2$  (5 mL) under argon. The mixture became gray after being stirred for 10 h at room temperature, and the solvent was then removed in vacuo at room temperature to give a gray solid, followed by extraction with hot DMSO (2~3 mL). The crystalline product was prepared by slow diffusion of ethyl ether into the solution of crude product in DMSO at ambient temperature in *ca.* 85 % yield. Colorless block crystals  $[(R)\text{-}\mathbf{1}\cdot\text{Ag}]_2(\text{PF}_6)_2$  suitable for X-ray analysis were obtained by slow diffusion of ethyl ether into the corresponding DMSO solution at room temperature through several days.  $^1\text{H}$  NMR (400 MHz,  $\text{DMSO-}d_6$ ):  $\delta$  3.97 (dd,  $J = 6.8$  Hz, 6.8 Hz, 4H), 4.32 (dd,  $J = 4.8$  Hz, 4.8 Hz, 4H), 5.25 (d,  $J = 15.6$  Hz, 4H), 5.41 (d,  $J = 16.0$  Hz, 4H), 5.77 (t,  $J = 5.6$  Hz, 4H), 6.47 (t,  $J = 7.2$  Hz, 4H), 6.56 (t,  $J = 7.6$  Hz, 8H), 6.94 (d,  $J = 7.6$  Hz, 8H), 7.38 (s, 2H), 7.90 (t,  $J = 8.4$  Hz, 2H), 8.02-8.05 (m, 4H) ppm.  $^{13}\text{C}$  NMR (100 MHz,

DMSO-*d*<sub>6</sub>):  $\delta$  59.3, 62.3, 69.7, 110.3, 121.9, 127.6, 128.2, 128.6, 132.1, 137.8, 139.0, 150.8, 178.0 (dd,  $^1J$   $^{107}\text{Ag}$  = 188.86 Hz,  $^1J$   $^{109}\text{Ag}$  = 214.7 Hz, carbene N-C-N) ppm.  $^{19}\text{F}$  NMR (376 MHz, DMSO-*d*<sub>6</sub>):  $\delta$  -69.2 (d,  $J$  = 756 Hz,  $\text{PF}_6^-$ ) ppm. Anal. Calcd for  $\text{C}_{56}\text{H}_{48}\text{Ag}_2\text{F}_{12}\text{N}_{12}\text{O}_4\text{P}$ : C, 46.11; H, 3.32; N, 11.52; Found: C, 45.79; H, 3.63; N, 11.75. ESI-TOF found:  $m/z$  = 583.10 (calcd for  $[(R)\text{-}\mathbf{1}\cdot\text{Ag}]^+$  583.10);  $m/z$  = 1313.17 (calcd for  $[(R)\text{-}\mathbf{1}\cdot\text{Ag}]_2(\text{PF}_6)^+$  1313.17).

### 3. Preparation and characterization of $[(S)\text{-}\mathbf{2}\cdot\text{Ag}]_3(\text{BF}_4)_3$

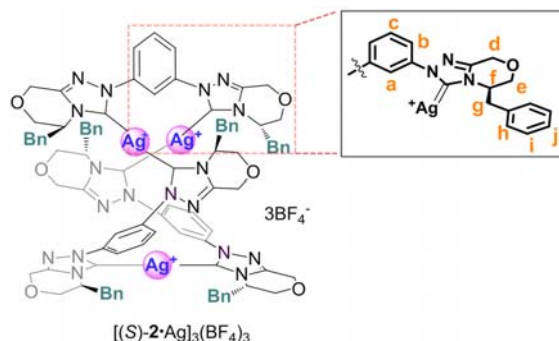

Bis-triazolium salt  $(S)\text{-}\mathbf{2}\cdot\text{HCl}$  (116 mg, 0.2 mmol), silver oxide (46 mg, 0.2 mmol), and  $\text{NaBF}_4$  (24 mg, 0.22 mmol) were added to  $\text{CH}_2\text{Cl}_2$  (5 mL) under argon. The mixture was stirred for 10 h at room temperature, and filtered through Celite. The solvent was removed in vacuo at room temperature to give a white solid, which was recrystallized from  $\text{CHCl}_3/\text{EtOAc}$  to afford a colorless crystalline product in 95% yield. Colorless block crystals  $[(S)\text{-}\mathbf{2}\cdot\text{Ag}]_3(\text{BF}_4)_3$  suitable for X-ray analysis were obtained by slow evaporation of the corresponding  $\text{CHCl}_3/\text{EtOAc}$  solution at ambient temperature through several days.

In addition,  $[(S)\text{-}\mathbf{2}\cdot\text{Ag}]_3(\text{BF}_4)_3$  could also be prepared by anion-exchange reaction of  $[(S)\text{-}\mathbf{2}\cdot\text{Ag}]_3(\text{X})_3$  ( $\text{X} = \text{Cl}$  and/or  $\text{AgCl}_2$ ) with  $\text{NaBF}_4$  (~ 3.3 equiv) in  $\text{CH}_2\text{Cl}_2$  for 24 h at room temperature.  $^1\text{H}$  NMR (400 MHz,  $\text{CDCl}_3$ ):  $\delta$  2.84-2.97 (m, 12H<sub>g</sub>), 3.70 (dd,  $J$  = 11.2 Hz, 12.0 Hz, 12H<sub>e</sub>), 3.98 (t,  $J$  = 7.6 Hz, 6H<sub>f</sub>), 4.62 (d,  $J$  = 15.6 Hz, 6H<sub>d</sub>), 5.02 (d,  $J$  = 16.0 Hz, 6H<sub>d</sub>), 6.45 (d,  $J$  = 7.2 Hz, 12H<sub>h</sub>), 7.03 (t,  $J$  = 7.2 Hz, 12H<sub>i</sub>), 7.08 (t,  $J$  = 7.2 Hz, 6H<sub>j</sub>), 7.87 (d,  $J$  = 7.6 Hz, 6H<sub>b</sub>), 8.00 (t,  $J$  = 8.0 Hz, 3H<sub>c</sub>) 8.50 (s, 3H<sub>a</sub>) ppm.  $^{13}\text{C}$  NMR (100 MHz,  $\text{CDCl}_3$ ):  $\delta$  40.5, 57.0, 62.1, 65.4, 120.1, 125.6, 127.2, 129.0, 130.7, 136.0, 141.4, 148.6, 148.7 ppm (Note: the carbene resonance of  $[(S)\text{-}\mathbf{2}\cdot\text{Ag}]_3(\text{BF}_4)_3$  was inconspicuous).  $^{18}\text{F}$  NMR (376 MHz,  $\text{CDCl}_3$ ):  $\delta$  -154.2 (s, 8F), -150.7 (s, 4F) ppm. Anal. Calcd for  $\text{C}_{90}\text{H}_{84}\text{Ag}_3\text{N}_{18}\text{O}_6\text{B}_3\text{F}_{12}$ : C, 51.53; H, 4.04; N, 12.02; Found: C, 51.72; H, 4.21; N, 12.43. ESI-TOF found:  $m/z$  = 611.11 (calcd for  $[(S)\text{-}\mathbf{2}\cdot\text{Ag}]^+$  611.13);  $m/z$  = 2012.41 (calcd for  $[(S)\text{-}\mathbf{2}\cdot\text{Ag}]_3(\text{BF}_4)_2^+$  2012.41).

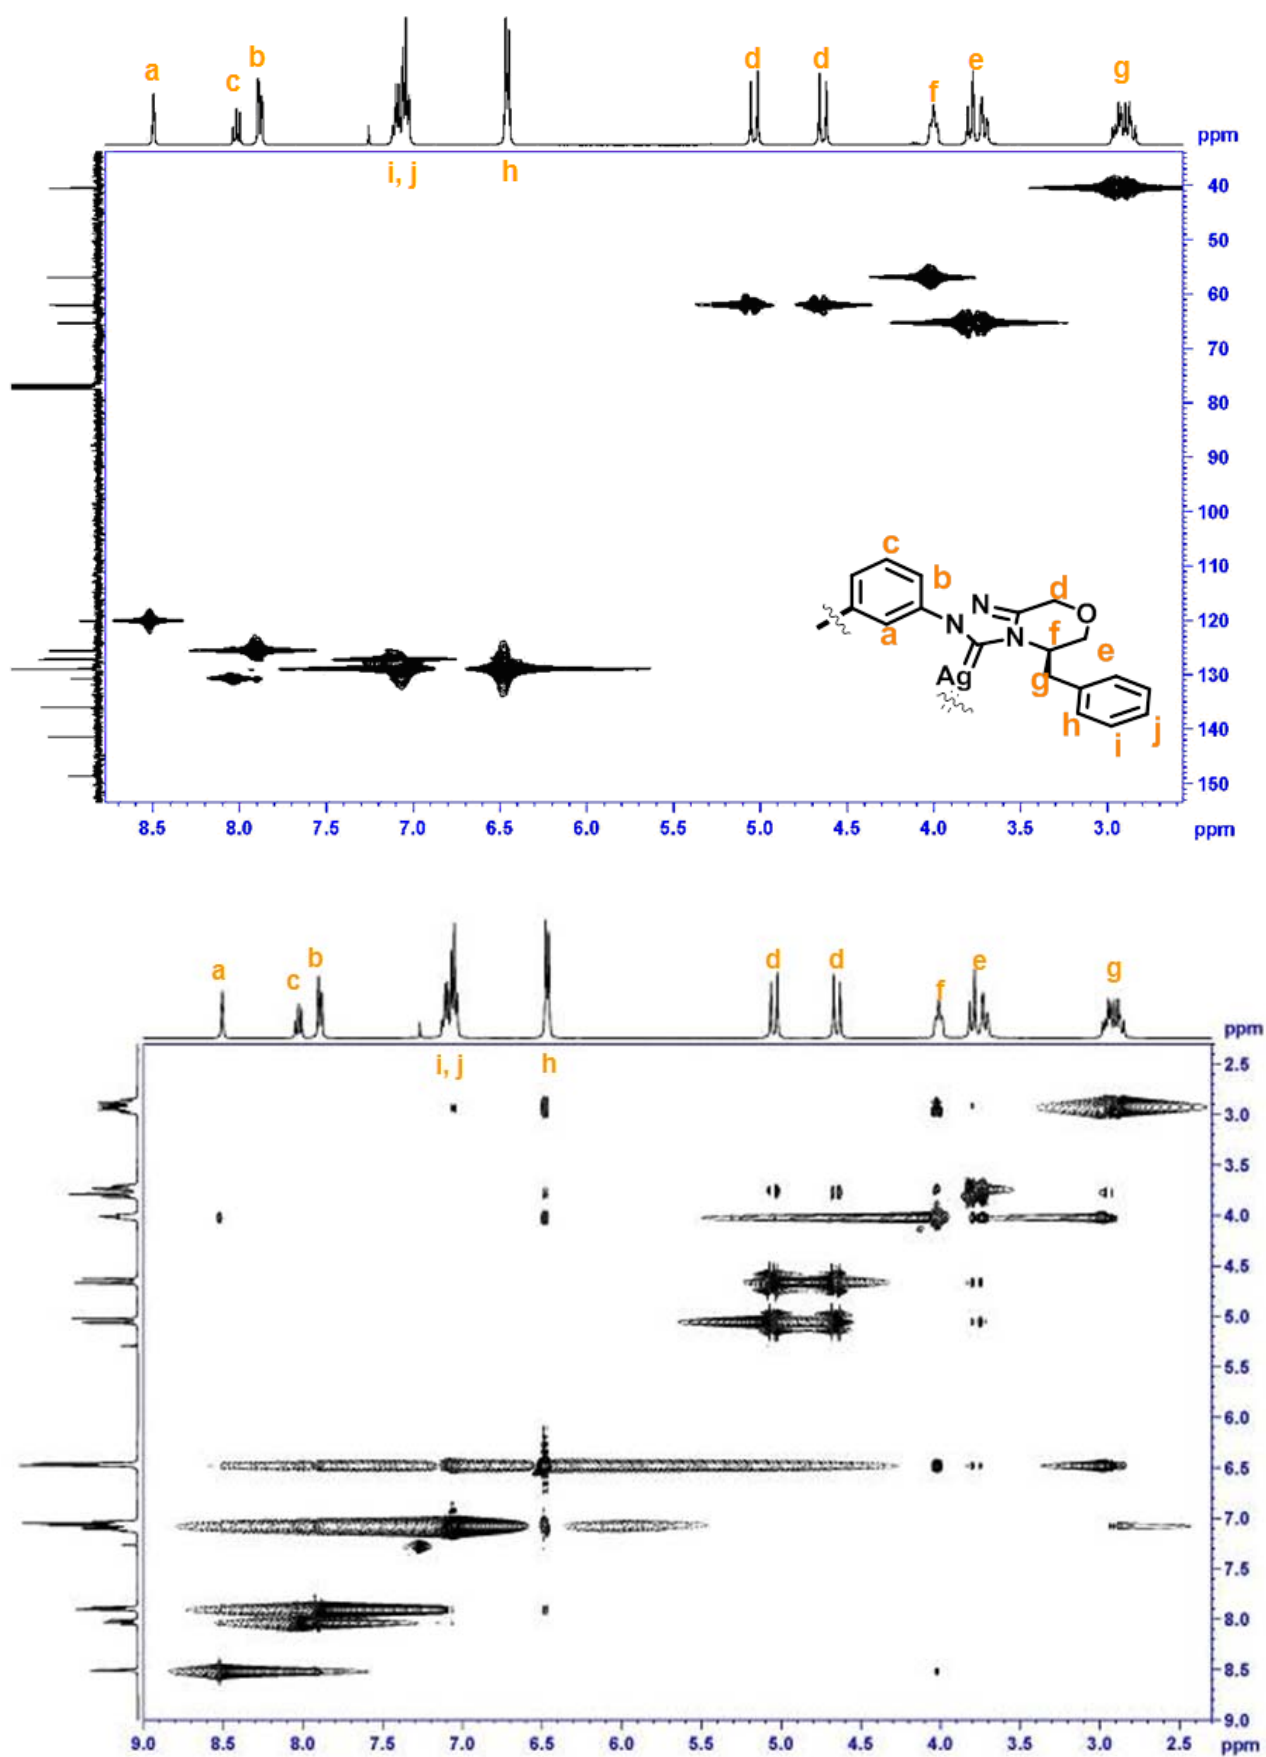

**Figure S1.** The HMQC and ROESY NMR of  $[(S)\text{-}2 \cdot \text{Ag}]_3(\text{BF}_4)_3$  in  $\text{CDCl}_3$ .

#### 4. Preparation and characterization of [(S)-2·Ag]<sub>3</sub>(PF<sub>6</sub>)<sub>3</sub>

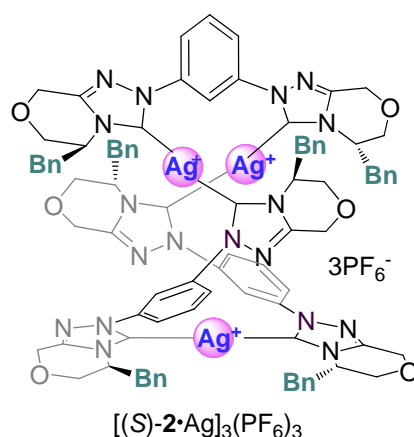

Bis-triazolium salt (S)-2·2HCl (58 mg, 0.1 mmol), silver oxide (23 mg, 0.1 mmol), and KPF<sub>6</sub> (20 mg, 0.11 mmol) were added to CH<sub>2</sub>Cl<sub>2</sub> (4 mL) under argon. The mixture was stirred for 10 h at room temperature, and filtered through Celite. The solvent was removed in vacuo at room temperature to afford a white solid, which was recrystallized from CHCl<sub>3</sub>/EtOAc to afford a colorless crystalline product in 75% yield.

In addition, [(S)-2·Ag]<sub>3</sub>(PF<sub>6</sub>)<sub>3</sub> could also be prepared by anion-exchange reaction of [(S)-2·Ag]<sub>3</sub>(X)<sub>3</sub> (X = Cl and/or AgCl<sub>2</sub>) with KPF<sub>6</sub> (~3.3 equiv) in CH<sub>2</sub>Cl<sub>2</sub> for 24 h at room temperature. <sup>1</sup>H NMR (400 MHz, CDCl<sub>3</sub>): δ 2.85-2.98 (m, 12H), 3.70 (dd, *J* = 12.0 Hz, 11.2 Hz, 12H), 3.98 (t, *J* = 7.6 Hz, 6H), 4.63 (d, *J* = 16.0 Hz, 6H), 5.02 (d, *J* = 16.0 Hz, 6H), 6.45 (d, *J* = 7.2 Hz, 12H), 7.03-7.13 (m, 18 H), 7.88 (d, *J* = 8.0 Hz, 6H), 8.00 (t, *J* = 8.0 Hz, 3H) 8.51 (s, 3H) ppm. <sup>13</sup>C NMR (100 MHz, CDCl<sub>3</sub>): δ 40.0, 57.0, 62.2, 65.2, 117.5, 122.2, 122.6, 126.5, 128.4, 129.8, 130.2, 130.3, 136.1, 140.5, 147.7 ppm (Note: the carbene resonance of [(S)-2·Ag]<sub>3</sub>(PF<sub>6</sub>)<sub>3</sub> was inconspicuous). <sup>19</sup>F NMR (376 MHz, CDCl<sub>3</sub>): δ -72.4 (d, *J* = 840 Hz, 6F), -71.5 (d, *J* = 840 Hz, 12F). Anal. Calcd for C<sub>90</sub>H<sub>84</sub>Ag<sub>3</sub>N<sub>18</sub>O<sub>6</sub>P<sub>3</sub>F<sub>18</sub>: C, 47.57; H, 3.73; N, 11.10; Found: C, 48.22; H, 4.19; N, 11.37. ESI-TOF found: *m/z* = 611.12 (calcd for [(S)-2·Ag]<sup>+</sup> 611.13); *m/z* = 2125.24 (calcd for [(S)-2·Ag]<sub>3</sub>(PF<sub>6</sub>)<sub>2</sub><sup>+</sup> 2125.33).

Colorless block crystals [(S)-2·Ag]<sub>3</sub>(PF<sub>6</sub>)<sub>3</sub> suitable for X-ray analysis were obtained by slow evaporation of the corresponding dichloromethane/ethyl acetate solution at ambient temperature through several days. Because the counteranions and solvent molecules could not be precisely located from the difference maps due to their high thermal disorder, these counteranions and solvent molecules were omitted by Squeeze program, and the Squeeze results were appended to the CIF file.

The crystal structure of  $[(S)\text{-}2\cdot\text{Ag}]_3(\text{PF}_6)_3$  was shown in Figure S2. The dihedral angle between the two NHC rings connected by a 1,3-phenylene unit was  $82.73^\circ$ , which was close to that in  $[(S)\text{-}2\cdot\text{Ag}]_3(\text{BF}_4)_3$  ( $82.81^\circ$ ).

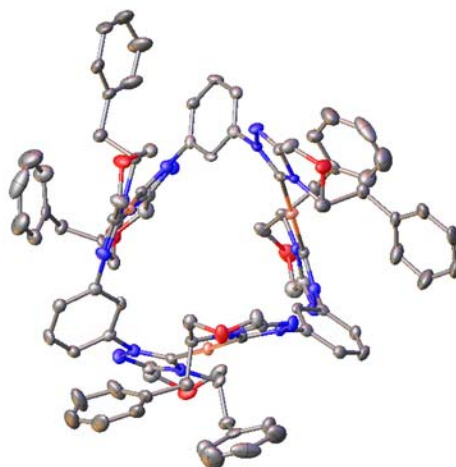

**Figure S2.** The crystal structure of  $[(S)\text{-}2\cdot\text{Ag}]_3(\text{PF}_6)_3$  viewed along the *c* axis. The counteranions and solvent molecules were omitted by Squeeze program. Hydrogen atoms have been omitted for clarity. Atom color code: C (gray), N (blue), O (red), and Ag (orange).

## 5. Preparation and characterization of $[(S)\text{-}2\cdot\text{Au}]_3(\text{BF}_4)_3$

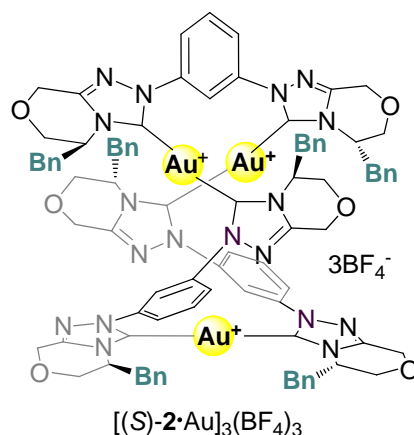

$[(S)\text{-}2\cdot\text{Ag}]_3(\text{BF}_4)_3$  (63 mg, 0.03 mmol) and (dimethylsulfide)gold(I) chloride  $[\text{AuCl}(\text{Me}_2\text{S})]$  (29.5 mg, 0.1 mmol, 3.3 equiv) were added to  $\text{CHCl}_3$  (10 mL) under argon. The mixture was stirred for 10 h at room temperature, and filtered through Celite. The filtrate was washed with water (5 mL), and the solvent was then removed in vacuo at room temperature to give a white solid, which was recrystallized from  $\text{CHCl}_3/\text{EtOAc}$  to afford colorless crystals (43 mg, ~60% yield). Colorless block crystals  $[(S)\text{-}2\cdot\text{Au}]_3(\text{BF}_4)_3$  suitable for X-ray analysis were obtained by slow evaporation of the corresponding chloroform/ethyl acetate solution at ambient temperature through several days.  $^1\text{H}$  NMR (400 MHz,  $\text{CDCl}_3$ ):  $\delta$  2.84-2.98 (m, 12H), 3.70 (dd,  $J = 12.0$  Hz, 11.2 Hz, 12H), 3.98 (t,  $J =$

7.6 Hz, 6H), 4.63 (d,  $J = 15.6$  Hz, 6H), 5.02 (d,  $J = 15.6$  Hz, 6H), 6.45 (d,  $J = 7.6$  Hz, 12H), 7.03-7.12 (m, 18 H), 7.88 (d,  $J = 7.6$  Hz, 6H), 8.00 (t,  $J = 8.0$  Hz, 3H) 8.51 (s, 3H) ppm.  $^{13}\text{C}$  NMR (100 MHz,  $\text{CDCl}_3$ ):  $\delta$  40.5, 57.0, 62.1, 65.3, 120.1, 125.5, 127.2, 129.0, 130.7, 136.0, 141.4, 148.8, 148.7, 181.2 (dd,  $J = 60$  Hz, 60 Hz, carbene N-C-N) ppm.  $^{19}\text{F}$  NMR (376 MHz,  $\text{CDCl}_3$ ): 150.7 (s, 8F), 154.1 (s, 4F). Anal. Calcd for  $\text{C}_{90}\text{H}_{84}\text{Au}_3\text{N}_{18}\text{O}_6\text{B}_3\text{F}_{12}$ : C, 45.71; H, 3.58; N, 10.66; Found: C, 45.36; H, 3.93; N, 10.29. ESI-TOF found:  $m/z = 701.19$  (calcd for  $[(S)\text{-}\mathbf{2}\cdot\text{Au}]^+$  701.19);  $m/z = 2277.57$  (calcd for  $[(S)\text{-}\mathbf{2}\cdot\text{Au}]_3(\text{BF}_4)_2^+$  2277.59).

## 6. Preparation and characterization of $[(R)\text{-}\mathbf{2}\cdot\text{Ag}]_3(\text{BF}_4)_3$

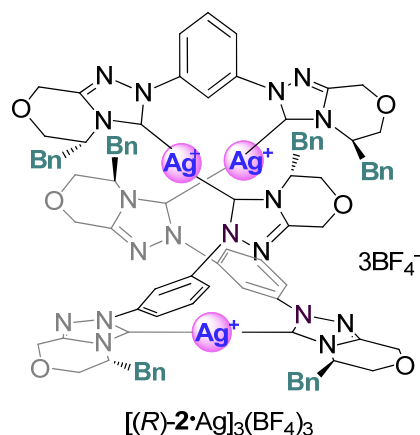

Bis-triazolium salt  $(R)\text{-}\mathbf{2}\cdot\text{2HCl}$  (58 mg, 0.1 mmol),  $\text{NaBF}_4$  (12 mg, 0.11 mmol), and silver oxide (23 mg, 0.1 mmol) were added to  $\text{CH}_2\text{Cl}_2$  (4 mL) under argon. The mixture was stirred for 10 h at room temperature, and filtered through Celite. The solvent was removed in vacuo at room temperature to give a white solid, which was recrystallized from  $\text{CHCl}_3/\text{EtOAc}$  to afford a colorless crystalline product in 90% yield. Colorless block crystals  $[(R)\text{-}\mathbf{2}\cdot\text{Ag}]_3(\text{BF}_4)_3$  suitable for X-ray analysis were obtained by slow evaporation of the corresponding dichloromethane/ethyl acetate solution at ambient temperature through several days.  $^1\text{H}$  NMR (400 MHz,  $\text{CDCl}_3$ ):  $\delta$  2.85-2.98 (m, 12H), 3.71 (dd,  $J = 11.2$  Hz, 12.0 Hz, 12H), 3.98 (t,  $J = 7.6$  Hz, 6H), 4.63 (d,  $J = 15.6$  Hz, 6H), 5.02 (d,  $J = 15.6$  Hz, 6H), 6.45 (d,  $J = 7.6$  Hz, 12H), 7.03-7.13 (m, 18 H), 7.88 (d,  $J = 7.6$  Hz, 6H), 8.00 (t,  $J = 8.0$  Hz, 3H) 8.54 (s, 3H) ppm.  $^{13}\text{C}$  NMR (100 MHz,  $\text{CDCl}_3$ ):  $\delta$  40.5, 57.0, 62.1, 65.3, 125.5, 127.2, 129.0, 129.0, 130.7, 136.0, 141.4, 148.8 ppm (Note: the carbene resonance of  $[(R)\text{-}\mathbf{2}\cdot\text{Ag}]_3(\text{BF}_4)_3$  was inconspicuous). Anal. Calcd for  $\text{C}_{90}\text{H}_{84}\text{Ag}_3\text{N}_{18}\text{O}_6\text{B}_3\text{F}_{12}$ : C, 51.53; H, 4.04; N, 12.02; Found: C, 51.63; H, 4.27; N, 12.08. ESI-TOF found:  $m/z = 611.12$  (calcd for  $[(R)\text{-}\mathbf{2}\cdot\text{Ag}]^+$  611.13);  $m/z = 2012.40$  (calcd for  $[(R)\text{-}\mathbf{2}\cdot\text{Ag}]_3(\text{BF}_4)_2^+$  2012.41).

## 7. Preparation and characterization of silver-NHC complexes through the reaction of Ag<sub>2</sub>O and the mixture of (*S*)-**2**·2HCl and (*R*)-**2**·2HCl at a 1:1 ratio

A mixture of bis-triazolium salts (*S*)-**2**·2HCl and (*R*)-**2**·2HCl (at a 1:1 ratio) (116 mg, 0.2 mmol), NaBF<sub>4</sub> (24 mg, 0.22 mmol), and silver oxide (46 mg, 0.2 mmol) were added to CH<sub>2</sub>Cl<sub>2</sub> (4 mL) under argon. The suspension became clear after being stirred for 10 h at room temperature, and then filtered through Celite. The solvent was removed in vacuo at room temperature to give a white solid (135 mg, 96% yield). <sup>1</sup>H NMR (400 MHz, CDCl<sub>3</sub>): δ 2.85-2.98 (m, 12H), 3.70 (dd, *J* = 11.2 Hz, 12.0 Hz, 12H), 3.98 (t, *J* = 7.6 Hz, 6H), 4.63 (d, *J* = 15.6 Hz, 6H), 5.02 (d, *J* = 15.6 Hz, 6H), 6.45 (d, *J* = 7.6 Hz, 12H), 7.03-7.13 (m, 18 H), 7.88 (d, *J* = 8.0 Hz, 6H), 8.00 (t, *J* = 7.6 Hz, 3H), 8.53 (s, 3H) ppm. <sup>13</sup>C NMR (100 MHz, CDCl<sub>3</sub>): δ 40.0, 57.0, 62.2, 65.2, 117.5, 122.7, 126.5, 128.4, 129.9, 130.1, 136.0, 140.5, 147.7 ppm (Note: the carbene resonances of the mixture were inconspicuous). Anal. Calcd for C<sub>90</sub>H<sub>84</sub>Ag<sub>3</sub>N<sub>18</sub>O<sub>6</sub>B<sub>3</sub>F<sub>12</sub>: C, 51.53; H, 4.04; N, 12.02; Found: C, 51.07; H, 3.64; N, 11.75. ESI-TOF found: *m/z* = 611.13 (calcd for [**2**·Ag]<sup>+</sup> 611.13); *m/z* = 2012.44 (calcd for [(**2**·Ag)<sub>3</sub>(BF<sub>4</sub>)<sub>2</sub>]<sup>+</sup> 2012.41).

## 8. Preparation and characterisation of [(*S*)-**3**·Ag]<sub>3</sub>(PF<sub>6</sub>)<sub>2</sub>(Cl)

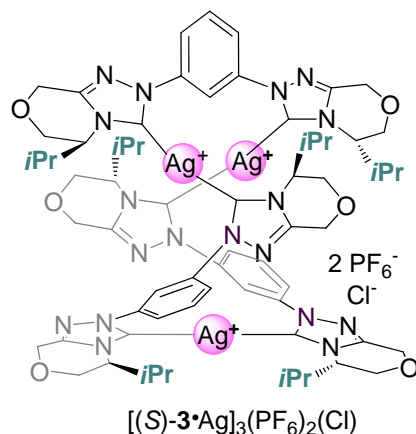

Bis-triazolium salt (*S*)-**3**·2HCl (48.5 mg, 0.1 mmol), KPF<sub>6</sub> (20 mg, 0.11 mmol), and silver oxide (23 mg, 0.1 mmol) were added to CH<sub>2</sub>Cl<sub>2</sub> (4 mL) under argon. The mixture was stirred for 10 h at room temperature, and then filtered through Celite. The solvent was removed in vacuo at room temperature to give a white solid, which was recrystallized from CHCl<sub>3</sub>/EtOAc to afford a colorless crystalline product (41 mg, ~ 65% yield). <sup>1</sup>H NMR (400 MHz, CDCl<sub>3</sub>): δ 0.56 (d, *J* = 6.8 Hz, 12H), 0.74 (d, *J* = 7.2 Hz, 12H), 0.84 (s, 6H), 0.95 (s, 6H), 2.22 (d, *J* = 4.8 Hz, 4H), 2.38 (s, 2H), 3.76 (d, *J* = 9.2 Hz, 6H), 4.02 (t, *J* = 11.6 Hz, 6H), 4.22 (d, *J* = 12.8 Hz, 3H), 4.51 (s, 2H), 4.68 (d, *J* = 15.6

Hz, 4H), 4.84 (d,  $J = 16.0$  Hz, 3H), 4.99 (dd,  $J = 2.8$  Hz, 2.8 Hz, 6H), 7.59 (t,  $J = 8.0$  Hz, 1 H), 7.73-7.78 (m, 6H), 7.85 (d,  $J = 7.6$  Hz, 2H), 8.67 (s, 3H) ppm.  $^{13}\text{C}$  NMR (100 MHz,  $\text{CDCl}_3$ ):  $\delta$  17.3, 17.7, 19.3, 19.8, 29.7, 33.1, 59.7, 59.8, 61.7, 61.9, 63.5, 64.4, 119.0, 125.2, 130.6, 131.3, 134.0, 141.3, 149.7, 149.9 ppm (Note: the carbene resonances in  $[(S)\text{-}\mathbf{3}\cdot\text{Ag}]_3(\text{PF}_6)_2(\text{Cl})$  were inconspicuous).  $^{19}\text{F}$  NMR (376 MHz,  $\text{CDCl}_3$ ):  $\delta$  -71.43 (d, 1012 Hz,  $\text{PF}_6$ ) ppm. Anal. Calcd for  $\text{C}_{66}\text{H}_{84}\text{Ag}_3\text{N}_{18}\text{O}_6\text{P}_2\text{F}_{12}\text{Cl}$ : C, 42.29; H, 4.52; N, 13.45; Found: C, 42.01; H, 4.25; N, 13.17. ESI-TOF found:  $m/z = 515.11$  (calcd for  $[(S)\text{-}\mathbf{3}\cdot\text{Ag}]^+$  515.13);  $m/z = 1582.37$  (calcd for  $[[ (S)\text{-}\mathbf{3}\cdot\text{Ag}]_3\text{Cl}]^{2+}$  1582.37).

Colorless block crystals  $[(S)\text{-}\mathbf{3}\cdot\text{Ag}]_3(\text{PF}_6)_2(\text{Cl})\cdot(\text{CHCl}_3)\cdot(\text{EtOAc})$  suitable for X-ray analysis were obtained by slow evaporation of the corresponding chloroform/ethyl acetate solution at ambient temperature through several days. The crystal structure of  $[(S)\text{-}\mathbf{3}\cdot\text{Ag}]_3(\text{PF}_6)_2(\text{Cl})\cdot(\text{CHCl}_3)\cdot(\text{EtOAc})$  viewed from different angles are shown in Figure S3.

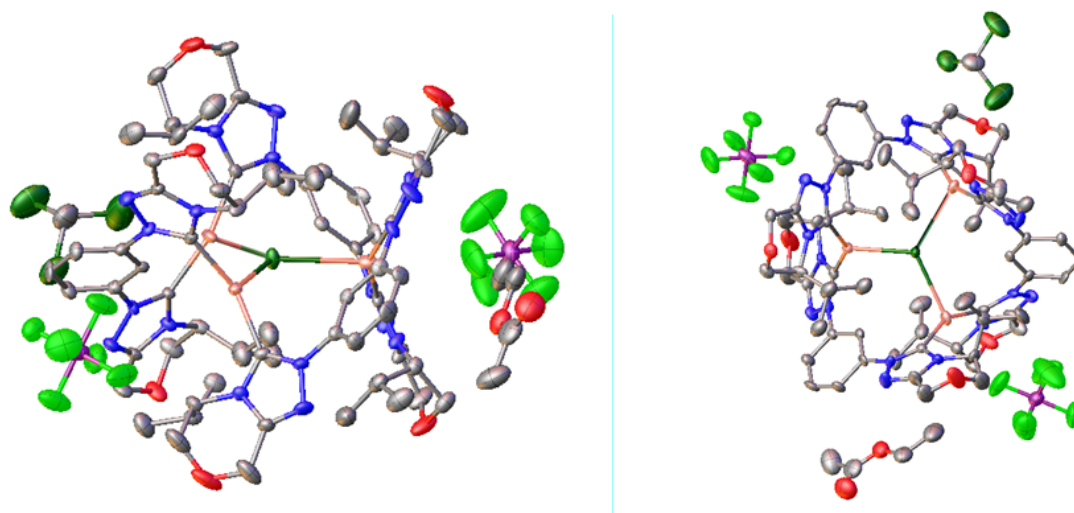

**Figure S3.** The crystal structure of  $[(S)\text{-}\mathbf{3}\cdot\text{Ag}]_3(\text{PF}_6)_2(\text{Cl})\cdot(\text{CHCl}_3)\cdot(\text{EtOAc})$  viewed from different angles. Hydrogen atoms and solvents have been omitted for clarity. Atom color code: C (gray), N (blue), O (red), Ag (dark gray), Cl (bottle green), P (cyan), and F (green).

## 9. Preparation and characterization of $[(S)\text{-}\mathbf{2}\cdot\text{Ag}]_3(\text{X})_3$ ( $\text{X} = \text{Cl}$ and/or $\text{AgCl}_2$ )

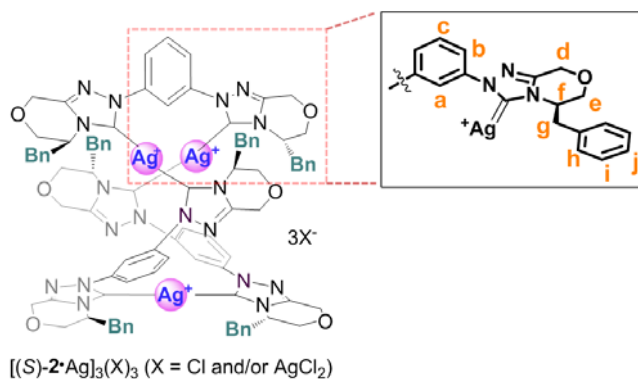

Bis-triazolium salt  $(S)\text{-}2\cdot\text{HCl}$  (58 mg, 0.1 mmol), and silver oxide (23 mg, 0.1 mmol) were added to  $\text{CH}_2\text{Cl}_2$  (4 mL) under argon. The mixture was stirred for 10 h at room temperature, and then filtered through Celite. The solvent was removed in vacuo at room temperature to give a grey solid. The solid was then dissolved in  $\text{CHCl}_3$ , followed by addition of activated carbon. The mixture was refluxed under argon for 15 min, and then filtered through Celite. The filtrate was concentrated to *ca.* 5 mL, and then added to ethyl ester (50 mL) under stirring at room temperature to afford a white solid in 95% yield.  $^1\text{H}$  NMR (400 MHz,  $\text{CDCl}_3$ ):  $\delta$  2.54 (t,  $J = 12.0$  Hz,  $6\text{H}_g$ ), 3.52 (d,  $J = 12.4$  Hz,  $6\text{H}_e$ ), 3.68 (dd,  $J = 4.4$  Hz,  $4.0$  Hz,  $6\text{H}_g$ ), 3.78 (d,  $J = 12.4$  Hz,  $6\text{H}_e$ ), 4.70 (s, br,  $6\text{H}_f$ ), 4.70 (d,  $J = 15.4$  Hz,  $6\text{H}_d$ ), 5.01 (d,  $J = 16.0$  Hz,  $6\text{H}_d$ ), 7.11 (s,  $12\text{H}_i$  and  $6\text{H}_j$ ), 7.29 (s,  $12\text{H}_h$ ), 7.58 (s,  $3\text{H}_c$ ), 7.80 (d,  $J = 7.6$  Hz,  $6\text{H}_b$ ), 9.49 (s,  $3\text{H}_a$ ) ppm.  $^{13}\text{C}$  NMR (100 MHz,  $\text{CDCl}_3$ ):  $\delta$  39.9, 57.0, 62.2, 65.1, 117.5, 122.6, 126.5, 128.4, 128.9, 129.9, 130.1, 136.1, 140.5, 147.7 ppm (Note: the carbene resonances in  $[(S)\text{-}2\cdot\text{Ag}]_3(\text{X})_3$  ( $\text{X} = \text{Cl}$  and/or  $\text{AgCl}_2$ ) were inconspicuous). ESI-TOF found:  $m/z = 611.13$  (calcd for  $[(S)\text{-}2\cdot\text{Ag}]^+ 611.13$ );  $m/z = 1905.97$  (calcd for  $[(S)\text{-}2\cdot\text{Ag}]_3\text{Cl}_2^+ 1905.33$ );  $m/z = 2049.08$  (calcd for  $[(S)\text{-}2\cdot\text{Ag}]_3\text{Cl}(\text{AgCl}_2)^+ 2049.20$ ). Anal. calcd found: C, 51.01; H, 4.51; N, 12.39. It is difficult to calculate the relative amounts of anions ( $\text{Cl}^-$  and  $\text{AgCl}_2^-$ ) from the elemental analysis data of  $[(S)\text{-}2\cdot\text{Ag}]_3(\text{X})_3$  ( $\text{X} = \text{Cl}$  and/or  $\text{AgCl}_2$ ).

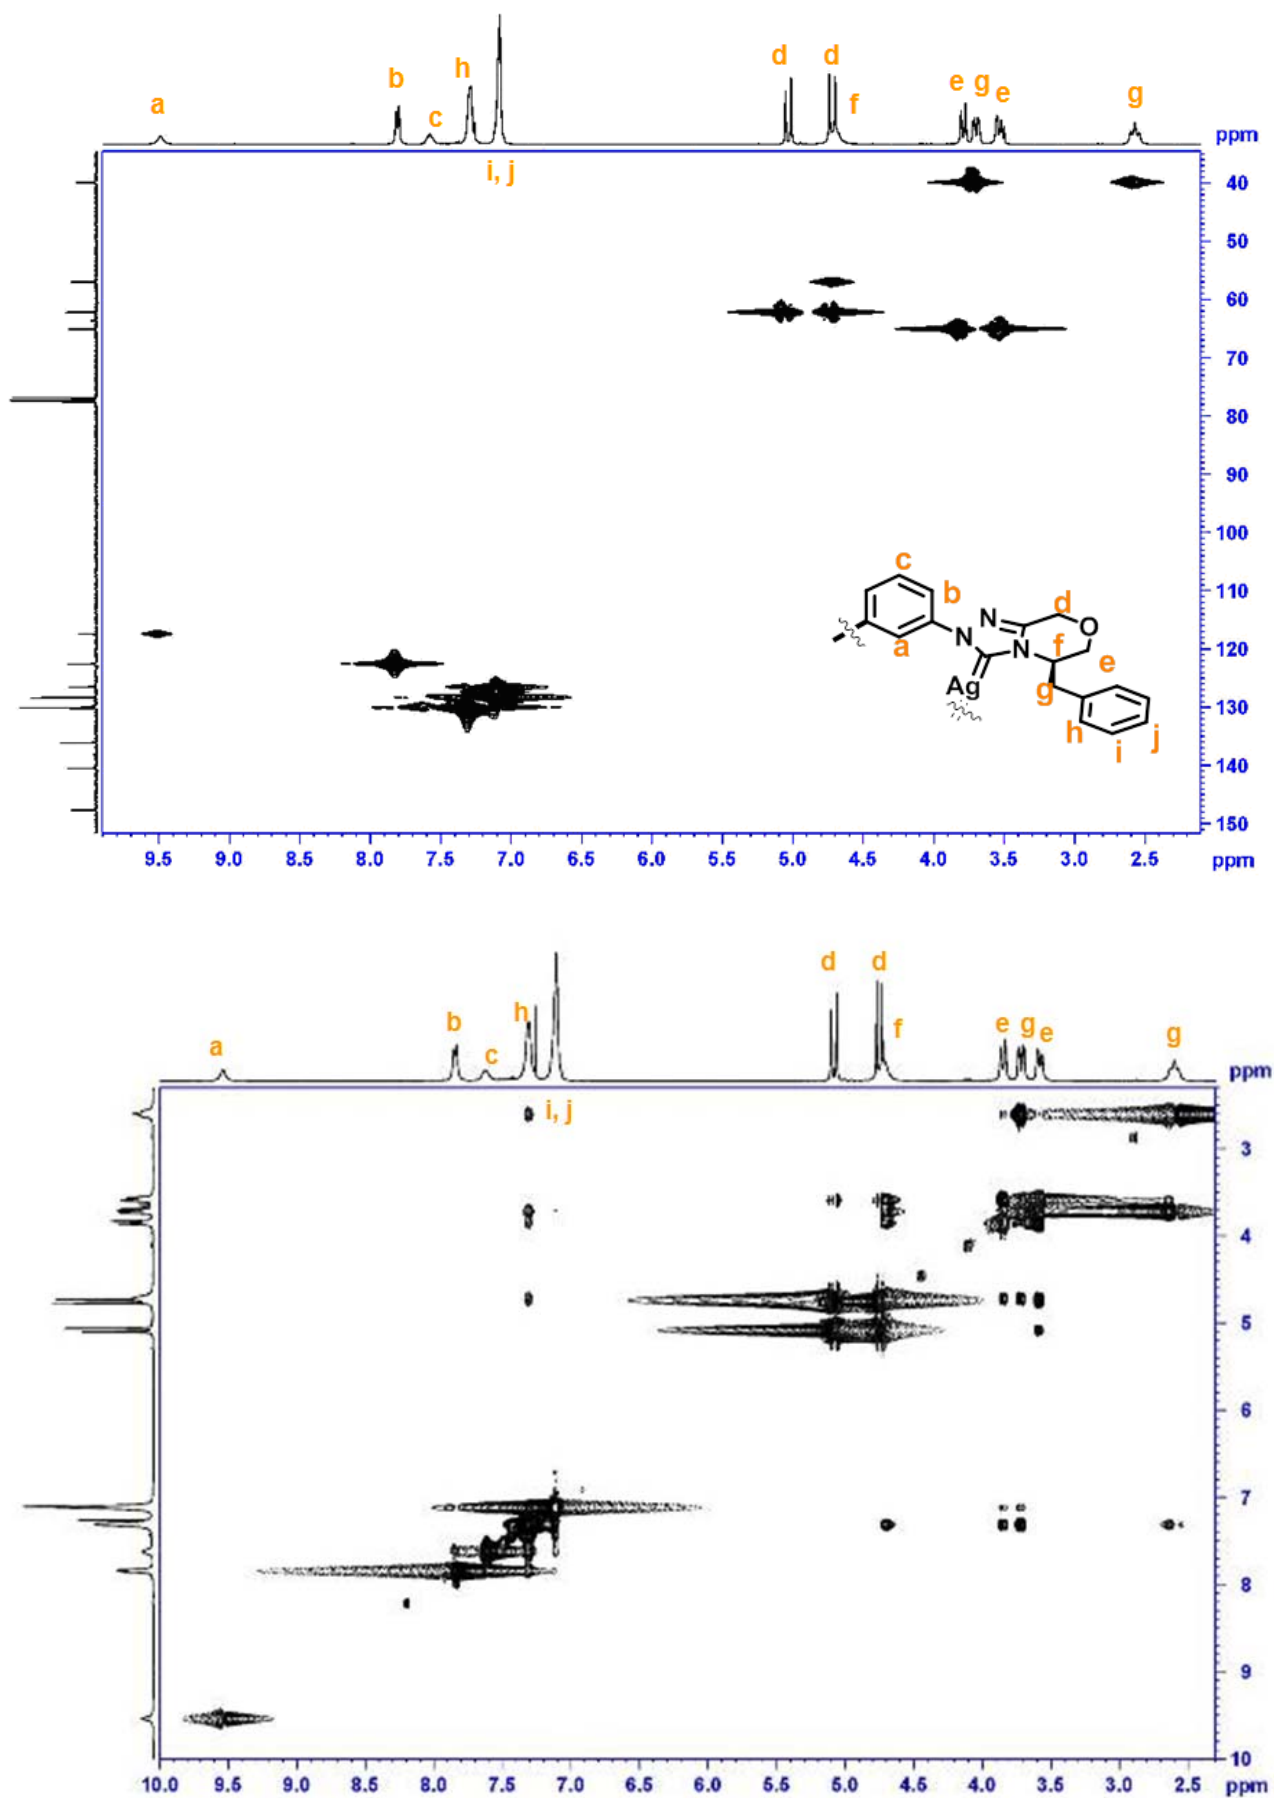

**Figure S4.** The HMQC and ROESY NMR of  $[(S)\text{-}2\text{-Ag}]_3(\text{X})_3$  ( $\text{X} = \text{Cl}$  and/or  $\text{AgCl}_2$ ) in  $\text{CDCl}_3$ .

## 10. Preparation and characterization of [(S)-2·Ag]<sub>3</sub>(CH<sub>3</sub>CO<sub>2</sub>)<sub>3</sub>

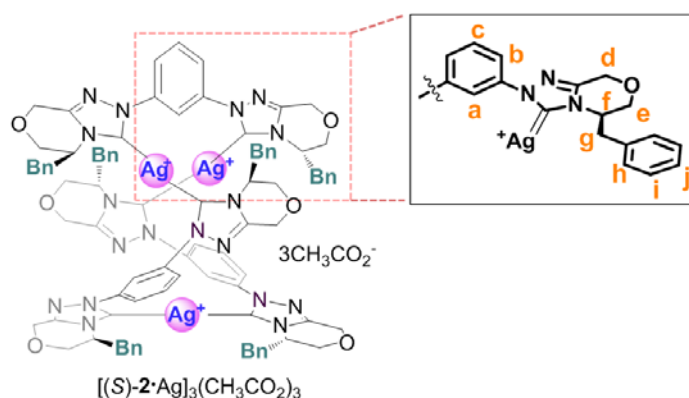

[(S)-2·Ag]<sub>3</sub>(X)<sub>3</sub> (X = Cl and/or AgCl<sub>2</sub>) (62 mg, ~ 0.03 mmol) and silver acetate (17 mg, 0.1 mmol, 3.3 equiv) were added to CHCl<sub>3</sub> (10 mL) under argon. The mixture was stirred for 10 h at room temperature, followed addition of activated carbon. The resulting mixture was stirred at 30 °C for 15 min, and then filtered through a Celite. The filtrate was washed with water (5 mL), concentrated to *ca.* 4 mL, and then added to ethyl ester (50 mL) under stirring to afford a white solid (56 mg, 94% yield). <sup>1</sup>H NMR (400 MHz, CDCl<sub>3</sub>): δ 2.05 (s, 9H, CH<sub>3</sub>CO<sub>2</sub>), 3.17 (t, *J* = 12.4 Hz, 6H<sub>g</sub>), 3.58 (dd, *J* = 4.4 Hz, 4.4 Hz, 6H<sub>g</sub>), 3.79 (d, *J* = 10.8 Hz, 6H<sub>e</sub>), 4.11 (d, *J* = 12.4 Hz, 6H<sub>e</sub>), 4.70 (s, br, 6H<sub>f</sub>), 4.83 (d, *J* = 16.4 Hz, 6H<sub>d</sub>), 5.13 (dd, *J* = 16.0 Hz, 6H<sub>d</sub>), 7.28 (t, *J* = 4.0 Hz, 6H<sub>j</sub>), 7.34-7.35 (m, 12H<sub>i</sub> and 12H<sub>h</sub>), 7.58 (t, *J* = 7.6 Hz, 3H<sub>c</sub>), 8.01 (d, *J* = 8.0 Hz, 6H<sub>b</sub>) 8.68 (s, 3H<sub>a</sub>) ppm. <sup>13</sup>C NMR (100 MHz, CDCl<sub>3</sub>): δ 22.8, 40.0, 57.7, 62.2, 65.6, 116.3, 122.5, 127.5, 129.1, 129.8, 130.1, 135.5, 140.0, 148.6, 178.9 ppm (Note: the carbene resonance of [(S)-2·Ag]<sub>3</sub>(CH<sub>3</sub>CO<sub>2</sub>)<sub>3</sub> was inconspicuous). Anal. Calcd for C<sub>96</sub>H<sub>93</sub>Ag<sub>3</sub>N<sub>18</sub>O<sub>12</sub>: C, 57.24; H, 4.65; N, 12.52; Found: C, 57.65; H, 4.88; N, 12.28; ESI-TOF found: *m/z* = 611.10 (calcd for [(S)-2·Ag]<sup>+</sup> 611.13); *m/z* = 1954.41 (calcd for [(S)-2·Ag]<sub>3</sub>(CH<sub>3</sub>CO<sub>2</sub>)<sub>2</sub><sup>+</sup> 1954.43); *m/z* = 2014.40 (calcd for [(S)-2·Ag]<sub>3</sub>(CH<sub>3</sub>CO<sub>2</sub>)<sub>3</sub> + H]<sup>+</sup> 2014.45).

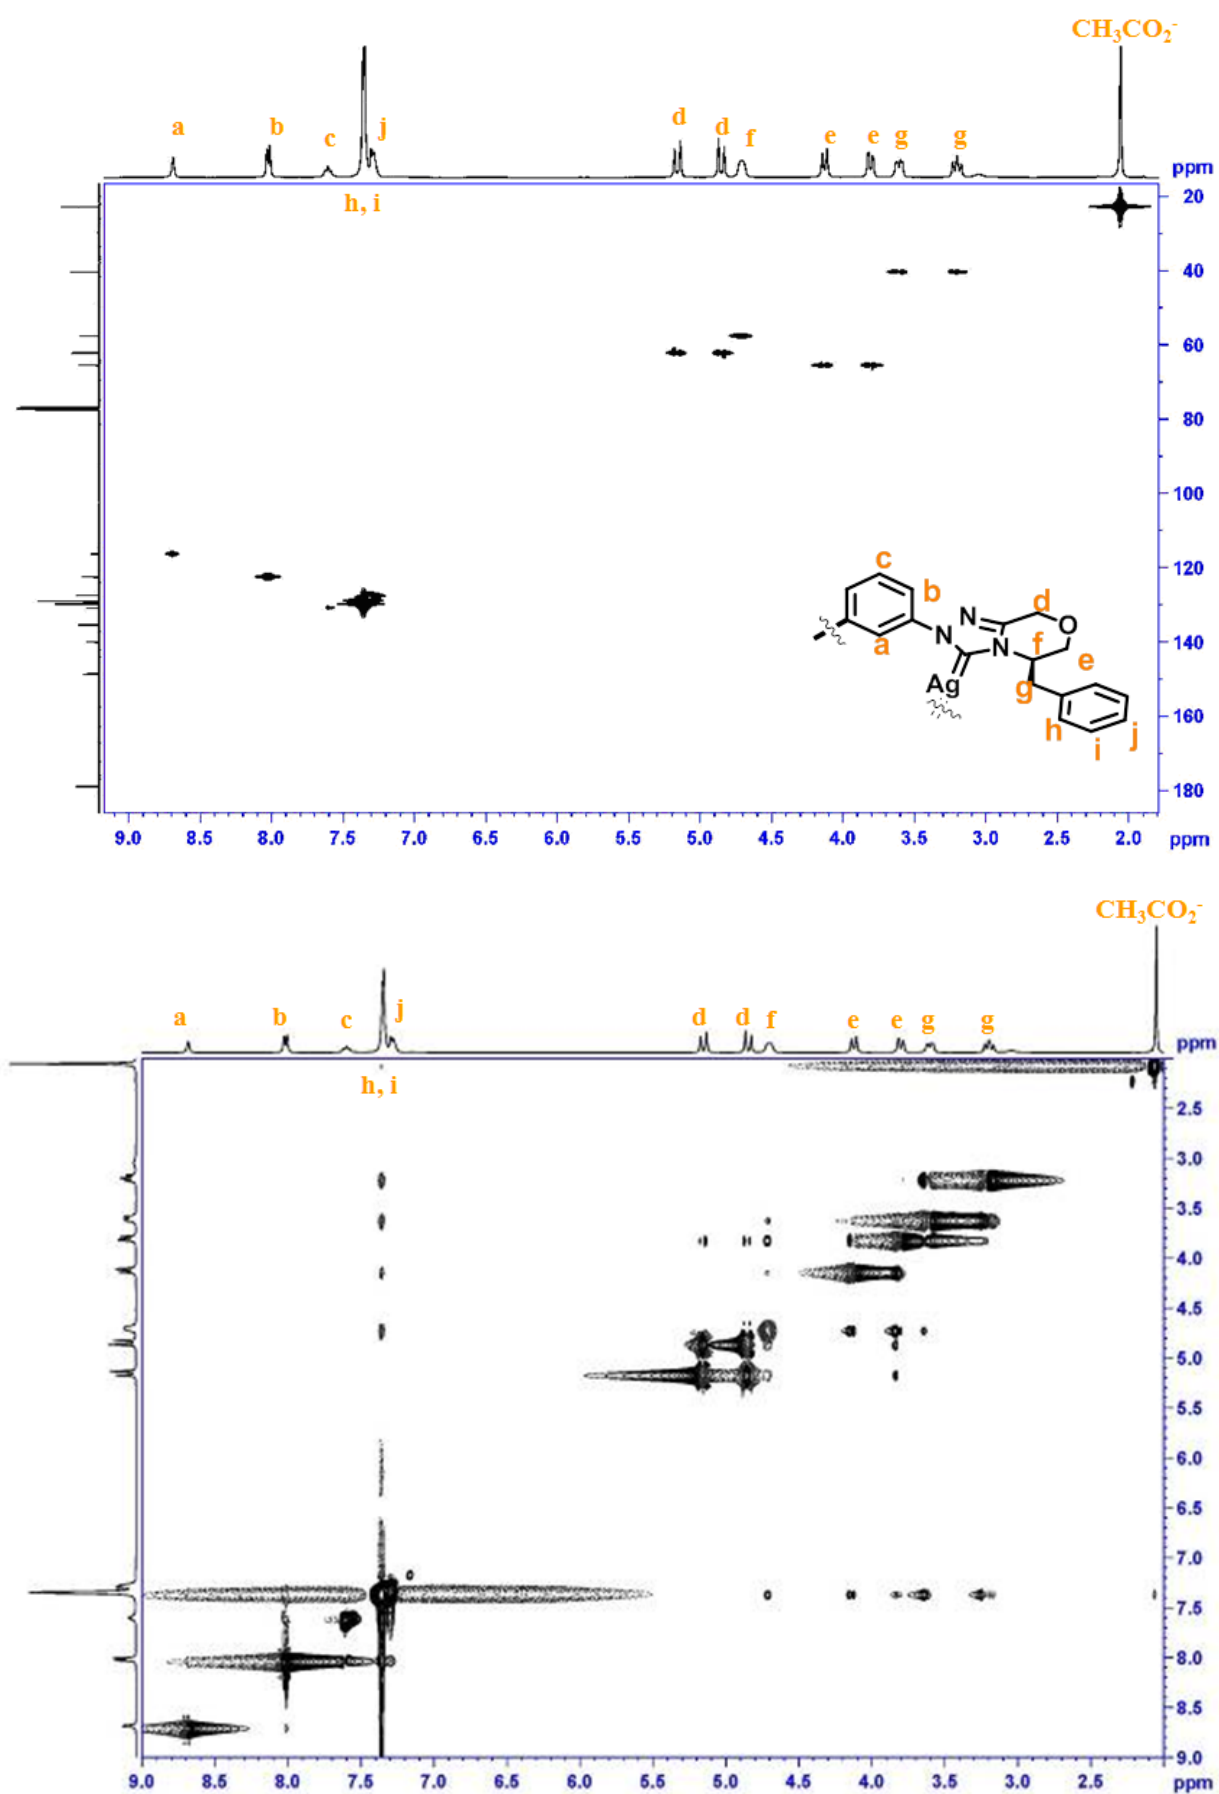

**Figure S5.** The HMQC and ROESY NMR of  $[(S)\text{-}2\text{-Ag}]_3(\text{CH}_3\text{CO}_2)_3$  in  $\text{CDCl}_3$ .

## 11. Preparation and characterization of [(*S*)-**2**·Ag]<sub>3</sub>(CF<sub>3</sub>CO<sub>2</sub>)<sub>3</sub>

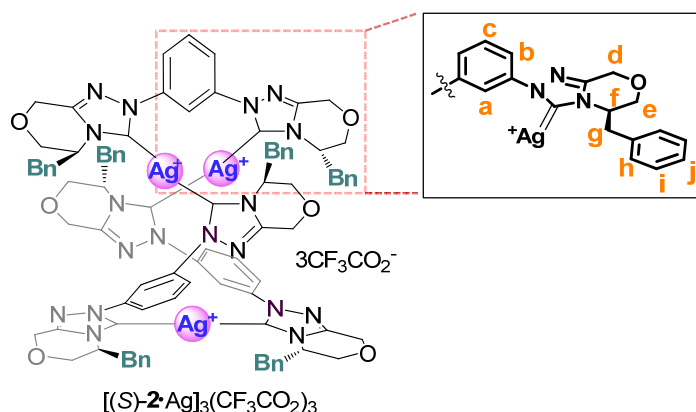

[(*S*)-**2**·Ag]<sub>3</sub>(X)<sub>3</sub> (X = Cl and/or AgCl<sub>2</sub>) (62 mg, ~ 0.03 mmol), and silver trifluoroacetate (22.1 mg, 0.1 mmol, 3.3 equiv) were added to CHCl<sub>3</sub> (10 mL) under argon. The mixture was stirred for 10 h at room temperature, and activated carbon was added. The mixture was stirred for 15 min at 30 °C, and then filtered through a Celite. The filtrate was washed with water (5 mL), concentrated to *ca.* 4 mL, and then added to ethyl ester (50 mL) under stirring to afford a white solid (55 mg, 85% yield). <sup>1</sup>H NMR (400 MHz, CDCl<sub>3</sub>): δ 3.08 (d, *J* = 11.2 Hz, 6H<sub>g</sub>), 3.31 (s, 6H<sub>g</sub>), 3.82 (d, *J* = 11.2 Hz, 6H<sub>e</sub>), 4.02 (d, *J* = 11.2 Hz, 6H<sub>e</sub>), 4.76 (s, br, 3H<sub>f</sub>), 4.80 (d, *J* = 16.0 Hz, 6H<sub>d</sub>), 4.80 (d, *J* = 16.0 Hz, 6H<sub>d</sub>), 7.06-7.16 (m, 12H<sub>h</sub>, 12H<sub>i</sub> and 6H<sub>j</sub>), 7.38 (s, 3H<sub>c</sub>), 7.92 (d, *J* = 6.8 Hz, 6H<sub>b</sub>), 8.64 (s, 3H<sub>a</sub>) ppm. <sup>13</sup>C NMR (100 MHz, CDCl<sub>3</sub>): δ 40.4, 57.2, 62.1, 65.8, 112.9, 115.9, 117.1, 118.8, 121.7, 123.0, 127.3, 129.0, 129.5, 130.6, 135.7, 140.4, 148.9, 161.2, 161.5, 181.6 ppm. <sup>19</sup>F NMR (376 MHz, CDCl<sub>3</sub>): δ 74.0 (s, CF<sub>3</sub>) ppm. Anal. Calcd for C<sub>96</sub>H<sub>84</sub>Ag<sub>3</sub>N<sub>18</sub>O<sub>12</sub>F<sub>9</sub>: C, 52.98; H, 3.89; N, 11.58; Found: C, 53.25; H, 4.22; N, 11.24. ESI-TOF found: *m/z* = 611.13 (calcd for [(*S*)-**2**·Ag]<sup>+</sup> 611.13); *m/z* = 2062.36 (calcd for [(*S*)-**2**·Ag]<sub>3</sub>(CF<sub>3</sub>CO<sub>2</sub>)<sup>2+</sup> 2062.37).

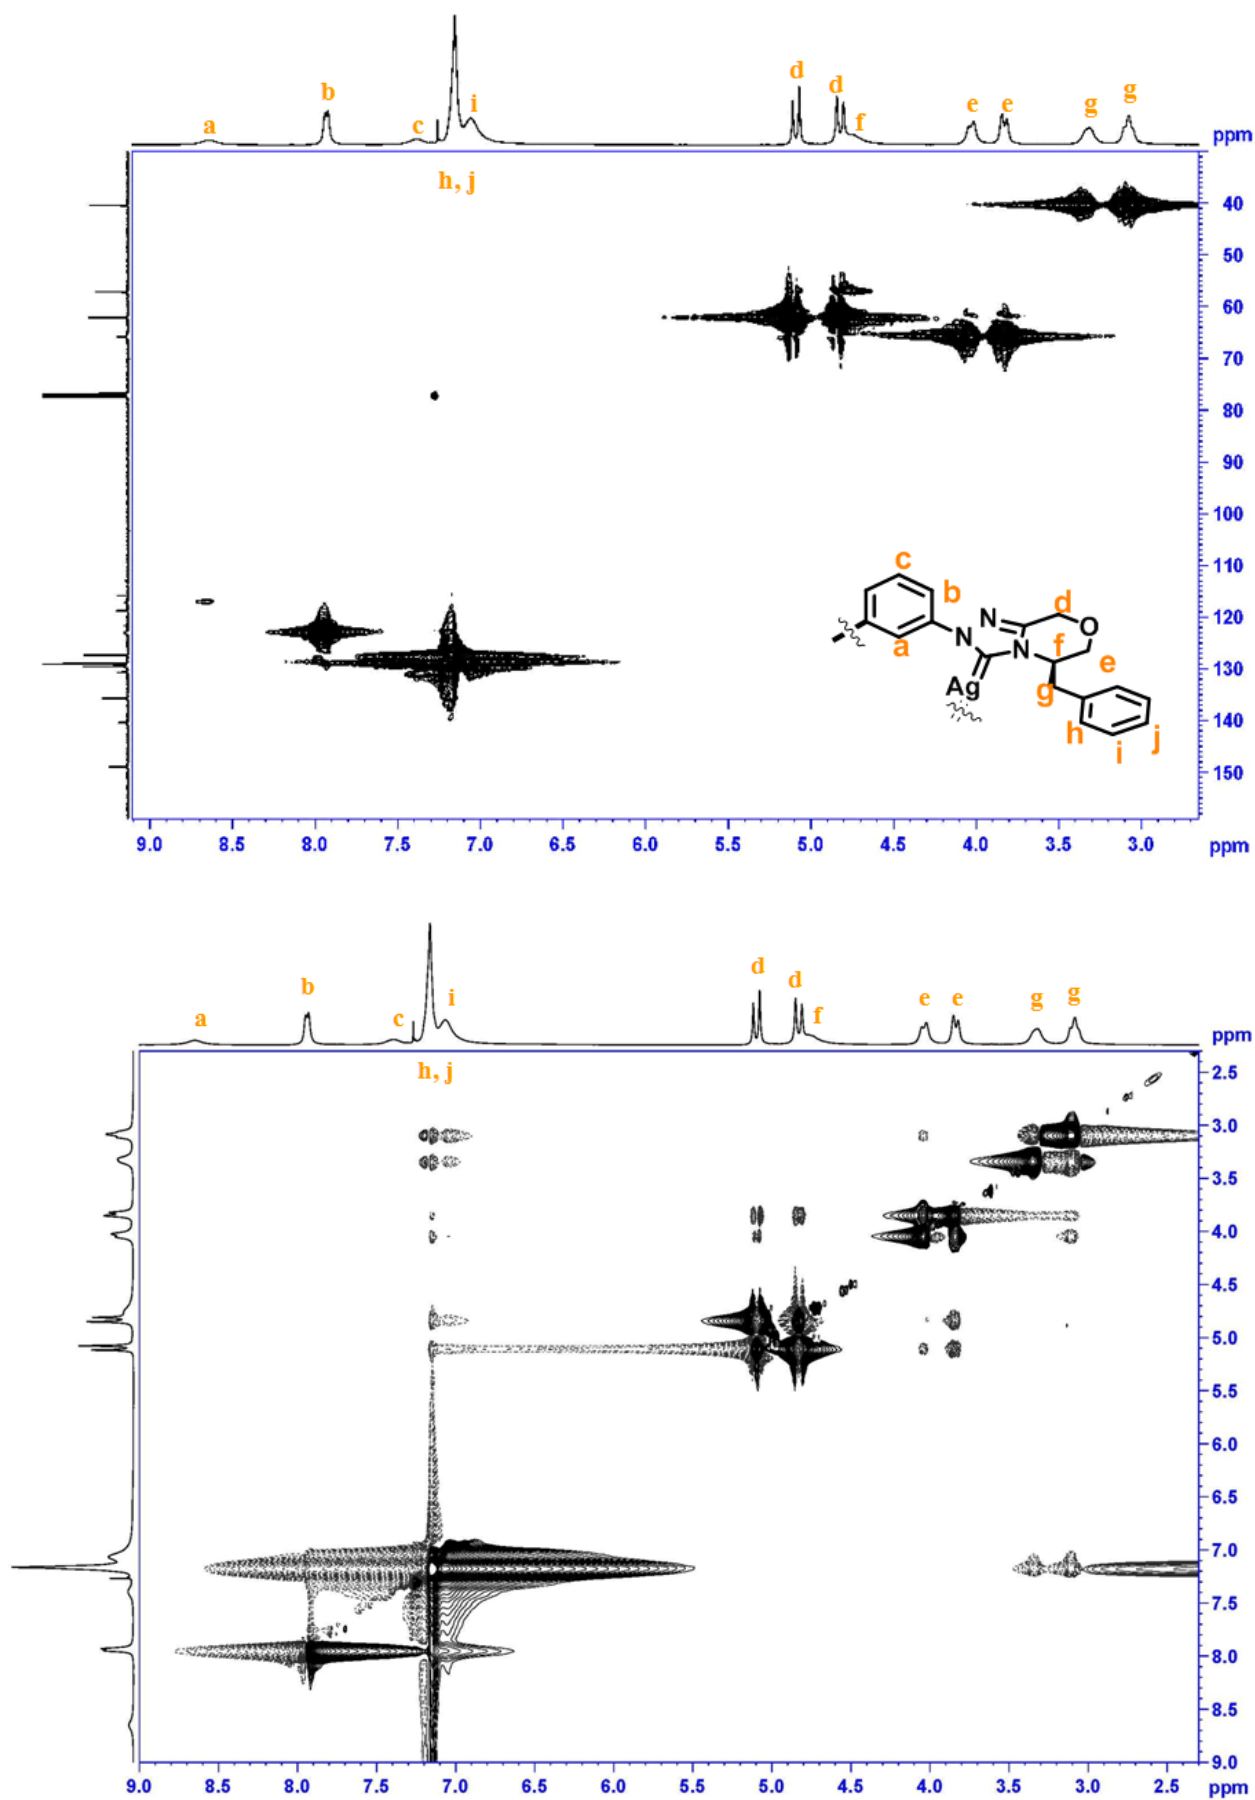

**Figure S6.** The HMQC and ROESY NMR of  $[(S)\text{-}2\cdot\text{Ag}]_3(\text{CF}_3\text{CO}_2)_3$  in  $\text{CDCl}_3$ .

**IV. Crystal parameters and refinement results of [(R)-1·Ag]<sub>2</sub>(PF<sub>6</sub>)<sub>2</sub>, [(R)-1·Ag]<sub>2</sub>(BF<sub>4</sub>)(Cl), [(S)-2·Ag]<sub>3</sub>(PF<sub>6</sub>)<sub>3</sub>, [(S)-2·Ag]<sub>3</sub>(BF<sub>4</sub>)<sub>3</sub>, [(S)-2·Au]<sub>3</sub>(BF<sub>4</sub>)<sub>3</sub>, [(R)-2·Ag]<sub>3</sub>(BF<sub>4</sub>)<sub>3</sub>, and [(S)-3·Ag]<sub>3</sub>(PF<sub>6</sub>)<sub>2</sub>(Cl)·(CHCl<sub>3</sub>)·(EtOAc)**

**Table S1.** Crystal Parameters and Refinement Results of [(R)-1·Ag]<sub>2</sub>(PF<sub>6</sub>)<sub>2</sub>, [(R)-1·Ag]<sub>2</sub>(BF<sub>4</sub>)(Cl), [(S)-2·Ag]<sub>3</sub>(PF<sub>6</sub>)<sub>3</sub>, [(S)-2·Ag]<sub>3</sub>(BF<sub>4</sub>)<sub>3</sub>, [(S)-2·Au]<sub>3</sub>(BF<sub>4</sub>)<sub>3</sub>, [(R)-2·Ag]<sub>3</sub>(BF<sub>4</sub>)<sub>3</sub>, and [(S)-3·Ag]<sub>3</sub>(PF<sub>6</sub>)<sub>2</sub>(Cl)·(CHCl<sub>3</sub>)·(EtOAc)

|                                                                             | [(R)-1·Ag] <sub>2</sub> (BF <sub>4</sub> )(Cl)                                                   | [(R)-1·Ag] <sub>2</sub> (PF <sub>6</sub> ) <sub>2</sub>                                          | [(S)-2·Ag] <sub>3</sub> (PF <sub>6</sub> ) <sub>3</sub> <sup>a</sup>           |
|-----------------------------------------------------------------------------|--------------------------------------------------------------------------------------------------|--------------------------------------------------------------------------------------------------|--------------------------------------------------------------------------------|
| Chemical formula                                                            | C <sub>56</sub> H <sub>48</sub> Ag <sub>2</sub> BClF <sub>4</sub> N <sub>12</sub> O <sub>4</sub> | C <sub>56</sub> H <sub>48</sub> Ag <sub>2</sub> F <sub>12</sub> N <sub>12</sub> O <sub>4</sub> P | C <sub>90</sub> H <sub>84</sub> Ag <sub>3</sub> N <sub>18</sub> O <sub>6</sub> |
| Formula weight (M)                                                          | 1291.06                                                                                          | 1458.74                                                                                          | 1837.36                                                                        |
| Temperature (K)                                                             | 150.0                                                                                            | 293(2)                                                                                           | 150.0                                                                          |
| Wavelength (Å)                                                              | 0.7107                                                                                           | 0.71073                                                                                          | 0.7107                                                                         |
| Crystal system                                                              | hexagonal                                                                                        | monoclinic                                                                                       | hexagonal                                                                      |
| Space group (H-M)                                                           | <i>P</i> 622                                                                                     | <i>P</i> 1 2/c 1                                                                                 | <i>P</i> 63                                                                    |
| Crystal size (mm <sup>3</sup> )                                             | 0.25×0.20×0.20                                                                                   | 0.28×0.20×0.04                                                                                   | 0.32×0.23×0.22                                                                 |
| <i>a</i> (Å)                                                                | 22.2009(5)                                                                                       | 14.883(9)                                                                                        | 17.2761(2)                                                                     |
| <i>b</i> (Å)                                                                | 22.2009(5)                                                                                       | 11.843(10)                                                                                       | 17.2761(2)                                                                     |
| <i>c</i> (Å)                                                                | 12.58554(19)                                                                                     | 19.893(10)                                                                                       | 18.7097(2)                                                                     |
| <i>α</i> (deg)                                                              | 90                                                                                               | 90                                                                                               | 90                                                                             |
| <i>β</i> (deg)                                                              | 90                                                                                               | 118.38(4)                                                                                        | 90                                                                             |
| <i>γ</i> (deg)                                                              | 120                                                                                              | 90                                                                                               | 120                                                                            |
| Volume (Å <sup>3</sup> )                                                    | 5372.11(18)                                                                                      | 3085(4)                                                                                          | 4836.01(10)                                                                    |
| <i>Z</i>                                                                    | 3                                                                                                | 4                                                                                                | 2                                                                              |
| Calculated density (g cm <sup>-3</sup> )                                    | 1.197                                                                                            | 1.276                                                                                            | 1.262                                                                          |
| <i>μ</i> (mm <sup>-1</sup> )                                                | 0.639                                                                                            | 0.778                                                                                            | 0.658                                                                          |
| Reflections collected                                                       | 6655                                                                                             | 6044                                                                                             | 13550                                                                          |
| Independent reflections                                                     | 3134                                                                                             | 5535                                                                                             | 5251                                                                           |
| <i>R</i> <sub>int</sub>                                                     | 0.0303                                                                                           | 0.0574                                                                                           | 0.0228                                                                         |
| <i>F</i> (000)                                                              | 1956                                                                                             | 1464                                                                                             | 1878                                                                           |
| GOF                                                                         | 1.097                                                                                            | 1.059                                                                                            | 1.078                                                                          |
| <i>R</i> <sub>1</sub> , <i>wR</i> <sub>2</sub> [ <i>I</i> > 2σ( <i>I</i> )] | 0.0688, 0.1874                                                                                   | 0.0982, 0.2019                                                                                   | 0.0409, 0.1165                                                                 |
| <i>R</i> <sub>1</sub> , <i>wR</i> <sub>2</sub> (all data)                   | 0.0769, 0.1963                                                                                   | 0.2709, 0.2388                                                                                   | 0.0462, 0.1202                                                                 |

  

|                                 | [(S)-2·Ag] <sub>3</sub> (BF <sub>4</sub> ) <sub>3</sub>                                                          | [(S)-2·Au] <sub>3</sub> (BF <sub>4</sub> ) <sub>3</sub>                                                          | [(R)-2·Ag] <sub>3</sub> (BF <sub>4</sub> ) <sub>3</sub>                                                          | [(S)-3·Ag] <sub>3</sub> (PF <sub>6</sub> ) <sub>2</sub> (Cl)·(CHCl <sub>3</sub> )·(EtOAc)                                        |
|---------------------------------|------------------------------------------------------------------------------------------------------------------|------------------------------------------------------------------------------------------------------------------|------------------------------------------------------------------------------------------------------------------|----------------------------------------------------------------------------------------------------------------------------------|
| Chemical formula                | C <sub>90</sub> H <sub>84</sub> Ag <sub>3</sub> B <sub>3</sub><br>F <sub>12</sub> N <sub>18</sub> O <sub>6</sub> | C <sub>90</sub> H <sub>84</sub> Au <sub>3</sub> B <sub>3</sub><br>F <sub>12</sub> N <sub>18</sub> O <sub>9</sub> | C <sub>90</sub> H <sub>84</sub> Ag <sub>3</sub> B <sub>3</sub><br>F <sub>12</sub> N <sub>18</sub> O <sub>6</sub> | C <sub>71</sub> H <sub>93</sub> Ag <sub>3</sub> Cl <sub>4</sub><br>F <sub>12</sub> N <sub>18</sub> O <sub>8</sub> P <sub>2</sub> |
| Formula weight (M)              | 2097.79                                                                                                          | 2413.08                                                                                                          | 2097.79                                                                                                          | 2082.99                                                                                                                          |
| Temperature (K)                 | 294.15                                                                                                           | 294.15                                                                                                           | 294.15                                                                                                           | 150.1                                                                                                                            |
| Wavelength (Å)                  | 0.7107                                                                                                           | 0.7107                                                                                                           | 0.7107                                                                                                           | 0.7107                                                                                                                           |
| Crystal system                  | hexagonal                                                                                                        | hexagonal                                                                                                        | hexagonal                                                                                                        | triclinic                                                                                                                        |
| Space group                     | <i>P</i> 63                                                                                                      | <i>P</i> 63                                                                                                      | <i>P</i> 63                                                                                                      | <i>P</i> 1                                                                                                                       |
| Crystal size (mm <sup>3</sup> ) | 0.42×0.36×0.30                                                                                                   | 0.38×0.30×0.28                                                                                                   | 0.32×0.28×0.24                                                                                                   | 0.25×0.20×0.20                                                                                                                   |
| <i>a</i> (Å)                    | 17.3366(4)                                                                                                       | 17.4146(4)                                                                                                       | 17.3399(3)                                                                                                       | 12.6553(3)                                                                                                                       |
| <i>b</i> (Å)                    | 17.3366(4)                                                                                                       | 17.4146(4)                                                                                                       | 17.3399(3)                                                                                                       | 13.0092(5)                                                                                                                       |
| <i>c</i> (Å)                    | 18.9739(3)                                                                                                       | 18.8187(4)                                                                                                       | 18.9738(3)                                                                                                       | 15.1663(4)                                                                                                                       |

|                                           |                |                |                |                |
|-------------------------------------------|----------------|----------------|----------------|----------------|
| $\alpha$ (deg)                            | 90             | 90             | 90             | 104.239(3)     |
| $\beta$ (deg)                             | 90             | 90             | 90             | 112.900(3)     |
| $\gamma$ (deg)                            | 120            | 120            | 120            | 99.765(3)      |
| Volume ( $\text{\AA}^3$ )                 | 4938.72(18)    | 4943.51(18)    | 4862.46(14)    | 2128.74(12)    |
| <i>Z</i>                                  | 2              | 2              | 2              | 1              |
| Calculated density ( $\text{g cm}^{-3}$ ) | 1.443          | 1.621          | 1.433          | 1.625          |
| $\mu$ ( $\text{mm}^{-1}$ )                | 0.674          | 4.526          | 0.681          | 0.936          |
| Reflections collected                     | 15602          | 13406          | 13681          | 13449          |
| Independent reflections                   | 6563           | 6306           | 6407           | 12951          |
| $R_{\text{int}}$                          | 0.0207         | 0.0245         | 0.0162         | 0.0168         |
| $F(000)$                                  | 2172           | 2364           | 2124           | 1057           |
| GOF                                       | 1.043          | 0.959          | 1.027          | 1.032          |
| $R_1, wR_2$ [ $I > 2\sigma(I)$ ]          | 0.0350, 0.1043 | 0.0363, 0.0963 | 0.0363, 0.1120 | 0.0391, 0.1015 |
| $R_1, wR_2$ (all data)                    | 0.0522, 0.1095 | 0.0556, 0.1002 | 0.0476, 0.1156 | 0.0413, 0.1045 |

<sup>a</sup> The counteranions ( $\text{PF}_6^-$ ) in  $[(S)\text{-2}\cdot\text{Ag}]_3(\text{PF}_6)_3$  were omitted by Squeeze program.

## V. Circular dichroism (CD) spectrum investigation of the silver NHC complexes

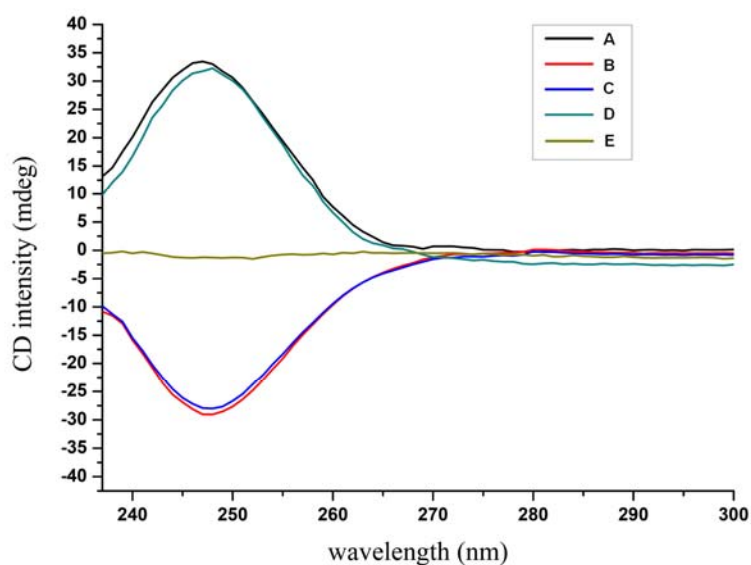

**Figure S7.** CD spectra of the silver NHC complexes at a concentration of  $0.1 \text{ mg mL}^{-1}$  in  $\text{CHCl}_3$ . **A** (black line):  $[(S)\text{-2}\cdot\text{Ag}]_3(\text{BF}_4)_3$ ; **B** (red line):  $[(R)\text{-2}\cdot\text{Ag}]_3(\text{BF}_4)_3$ ; **C** and **D** (blue and cyan line): two typical CD spectra of the randomly picked bulk single crystals obtained from recrystallization of the rude mixture of the reaction of  $\text{Ag}_2\text{O}$  and the mixture of  $(S)\text{-2}\cdot\text{2HCl}$  and  $(R)\text{-2}\cdot\text{2HCl}$  at a 1:1 ratio; **E** (tan line): CD spectrum of the rude mixture of the reaction of  $\text{Ag}_2\text{O}$  and the mixture of  $(S)\text{-2}\cdot\text{2HCl}$  and  $(R)\text{-2}\cdot\text{2HCl}$  at a 1:1 ratio (before recrystallization).

## VI. $^1\text{H}$ NMR spectral changes of $[(S)\text{-}2\text{-Ag}]_3(\text{BF}_4)_3$ upon addition of 10 equiv TBACl in $\text{CDCl}_3$

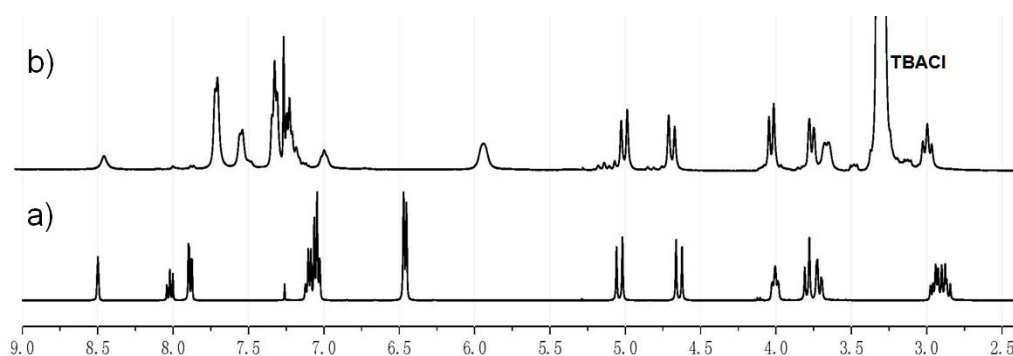

**Figure S8.**  $^1\text{H}$  NMR spectra (400 MHz,  $\text{CDCl}_3$ ) of a)  $[(S)\text{-}2\text{-Ag}]_3(\text{BF}_4)_3$ ; and b) upon addition of 10 equivalents of tetrabutylammonium chloride (TBACl) to a  $\text{CDCl}_3$  solution of  $[(S)\text{-}2\text{-Ag}]_3(\text{BF}_4)_3$  at 20 °C.

## VII. Influence of the counteranions of $[(S)\text{-}2\text{-Ag}]_3(\text{X})_3$ on the hierarchical self-assemblies

The compound  $[(S)\text{-}2\text{-Ag}]_3(\text{X})_3$  ( $\text{X} = \text{Cl}$  and/or  $\text{AgCl}_2$ ,  $\text{CH}_3\text{CO}_2$ , or  $\text{CF}_3\text{CO}_2$ ) was dispersed in 1 mL of solvent in a test tube. The resulting suspension was transferred to translucent gel after heating. The gel was simply confirmed by the “stable to inversion of a test tube” method. The results of gelation test in different solvents were summarized in Table S2.

**Table S2.** Gelation Test of Silver NHC Complexes (2 wt%) in Different Solvents

| Solvent                                            | Result                                            |                                                        |                                                        |
|----------------------------------------------------|---------------------------------------------------|--------------------------------------------------------|--------------------------------------------------------|
|                                                    | $[(S)\text{-}2\text{-Ag}]_3(\text{X})_3$          | $[(S)\text{-}2\text{-Ag}]_3(\text{CH}_3\text{CO}_2)_3$ | $[(S)\text{-}2\text{-Ag}]_3(\text{CF}_3\text{CO}_2)_3$ |
|                                                    | ( $\text{X} = \text{Cl}$ and/or $\text{AgCl}_2$ ) |                                                        |                                                        |
| $\text{CH}_2\text{Cl}_2$                           | S                                                 | S                                                      | S                                                      |
| $\text{CH}_2\text{Cl}_2/\text{EtOAc}$ (~ 1/10 v/v) | G                                                 | G                                                      | G                                                      |
| $\text{CHCl}_3/\text{EtOAc}$ (~ 1/10 v/v)          | G                                                 | G                                                      | G                                                      |
| $\text{CHCl}_3/\text{MeOH}$ (~ 1/10 v/v)           | G                                                 | G                                                      | G                                                      |
| $\text{CHCl}_3/\text{CH}_3\text{CN}$ (~ 1/10 v/v)  | G                                                 | G                                                      | Gp                                                     |
| MeOH                                               | P                                                 | P                                                      | P                                                      |
| $i\text{PrOH}$                                     | G                                                 | P                                                      | P                                                      |
| acetone                                            | S                                                 | G                                                      | G                                                      |
| $\text{CH}_3\text{CN}$                             | Gp                                                | G                                                      | G                                                      |
| THF                                                | S                                                 | G                                                      | Gp                                                     |
| EtOAc                                              | P                                                 | Gp                                                     | Gp                                                     |
| dioxane                                            | S                                                 | G                                                      | G                                                      |
| toluene                                            | S                                                 | Gp                                                     | Gp                                                     |
| $\text{CHCl}_3^a$                                  | G                                                 | G                                                      | G                                                      |

<sup>a</sup> Higher concentrations (~ 50 %) of [(S)-2·Ag]<sub>3</sub>(X)<sub>3</sub> (X = Cl and/or AgCl<sub>2</sub>, CH<sub>3</sub>CO<sub>2</sub>, CF<sub>3</sub>CO<sub>2</sub>) at 0 °C. S: solution; G: steady gel; G<sub>p</sub>: partial gel; P: precipitate.

### VIII. Morphology analysis of [(S)-2·Ag]<sub>3</sub>(X)<sub>3</sub> (X = BF<sub>4</sub>, Cl and/or AgCl<sub>2</sub>, CH<sub>3</sub>CO<sub>2</sub>, CF<sub>3</sub>CO<sub>2</sub>)

The morphologies of [(S)-2·Ag]<sub>3</sub>(X)<sub>3</sub> (X = BF<sub>4</sub>, Cl and/or AgCl<sub>2</sub>, CH<sub>3</sub>CO<sub>2</sub>, CF<sub>3</sub>CO<sub>2</sub>) were investigated using transmission electron microscope (TEM) and scanning transmission electron microscope (STEM). The TEM and STEM specimens were prepared by gently placing a carbon-coated copper grid on a surface of the sample. The grid was removed, stained with phosphotungstic acid aqueous solution (1 wt%) for [(S)-2·Ag]<sub>3</sub>(BF<sub>4</sub>)<sub>3</sub> and [(S)-2·Ag]<sub>3</sub>(CF<sub>3</sub>CO<sub>2</sub>)<sub>3</sub>, BaCl<sub>2</sub> aqueous solution (1 wt%) for [(S)-2·Ag]<sub>3</sub>(X)<sub>3</sub> (X = Cl and/or AgCl<sub>2</sub>), and uranyl acetate aqueous solution (1%) for [(S)-2·Ag]<sub>3</sub>(CH<sub>3</sub>CO<sub>2</sub>)<sub>3</sub> (or unstained), dried for 10 min at room temperature, and then subjected to observation.

### IX. <sup>1</sup>H NMR spectrum studies of [(S)-2·Ag]<sub>3</sub>(X)<sub>3</sub> (X = BF<sub>4</sub>, Cl and/or AgCl<sub>2</sub>, CH<sub>3</sub>CO<sub>2</sub>, CF<sub>3</sub>CO<sub>2</sub>)

The proton assignment of [(S)-2·Ag]<sub>3</sub>(X)<sub>3</sub> (X = BF<sub>4</sub>, Cl and/or AgCl<sub>2</sub>, CH<sub>3</sub>CO<sub>2</sub>, and CF<sub>3</sub>CO<sub>2</sub>) was confirmed by HMQC and ROESY NMR experiments in CDCl<sub>3</sub> (Figure S1, S4-S6). Compared with the <sup>1</sup>H NMR spectrum of [(S)-2·Ag]<sub>3</sub>(BF<sub>4</sub>)<sub>3</sub>, the chemical shifts of H<sub>a</sub>, H<sub>h</sub>, and H<sub>f</sub> of [(S)-2·Ag]<sub>3</sub>(X)<sub>3</sub> (X = Cl and/or AgCl<sub>2</sub>, CH<sub>3</sub>CO<sub>2</sub>, and CF<sub>3</sub>CO<sub>2</sub>) downfielded significantly, and the signals of H<sub>c</sub> were distinctly upfield shifted (Figure S9). These observations suggested significant differences in cation-anion interactions and noncovalent interactions of neighboring cation frameworks.

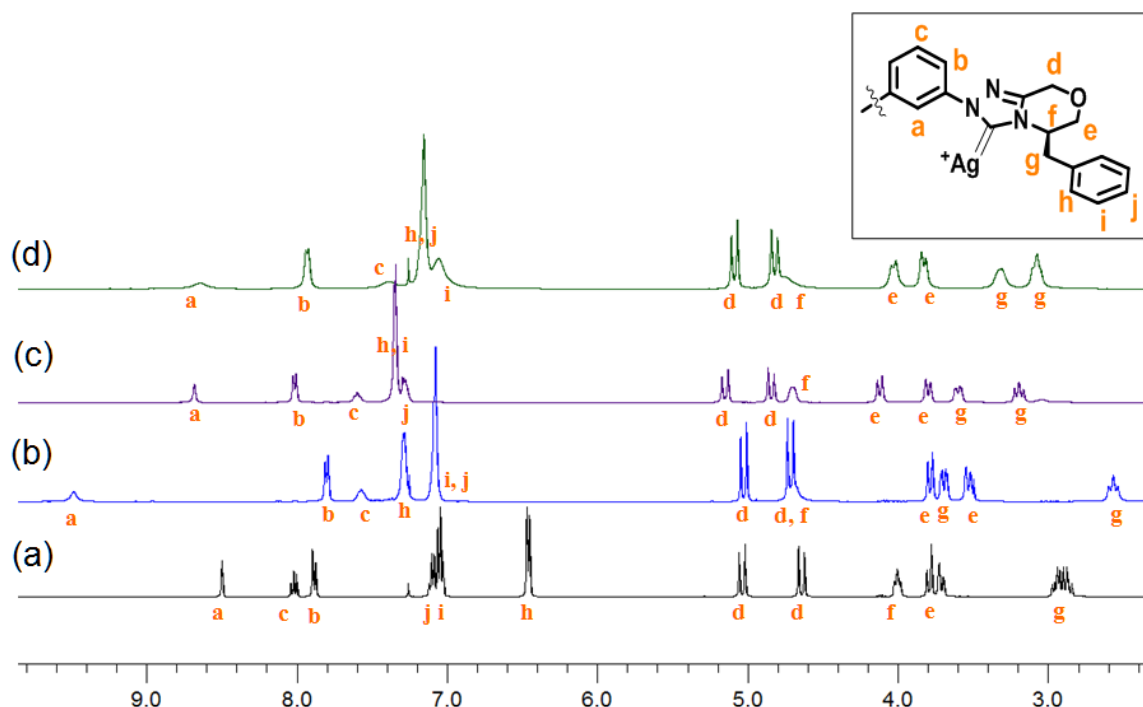

**Figure S9.**  $^1\text{H}$  NMR spectra (400 MHz,  $\text{CDCl}_3$ ) of (a)  $[(S)\text{-2}\cdot\text{Ag}]_3(\text{BF}_4)_3$ ; (b)  $[(S)\text{-2}\cdot\text{Ag}]_3(\text{X})_3$  ( $\text{X} = \text{Cl}$  and/or  $\text{AgCl}_2$ ); (c)  $[(S)\text{-2}\cdot\text{Ag}]_3(\text{CH}_3\text{CO}_2)_3$ ; and (d)  $[(S)\text{-2}\cdot\text{Ag}]_3(\text{CF}_3\text{CO}_2)_3$ .

## X. References

- 1 G. M. Scheldrick, *SHELX-97 and SHELXL-97, Program for Solution and Refinement of Crystal Structures* University of Göttingen: Germany, **1997**.
- 2 (a) L. J. Farrugia, *J. Appl. Cryst.* **1997**, *30*, 565; (b) A. L. Spek, *J. Appl. Cryst.* **2003**, *36*, 7; (c) O. V. Dolomanov, R. J. Gildea, J. A. K. Howard and H. Puschmann, *J. Appl. Cryst.* **2009**, *42*, 339.
- 3 Y. Ma, S. Wei, J. Wu, F. Yang, B. Liu, J. Lan, S. Yang and J. You, *Adv. Synth. Catal.* **2008**, *350*, 2645.

XI. Copies of  $^1\text{H}$ ,  $^{13}\text{C}$ , and  $^{19}\text{F}$  NMR spectra

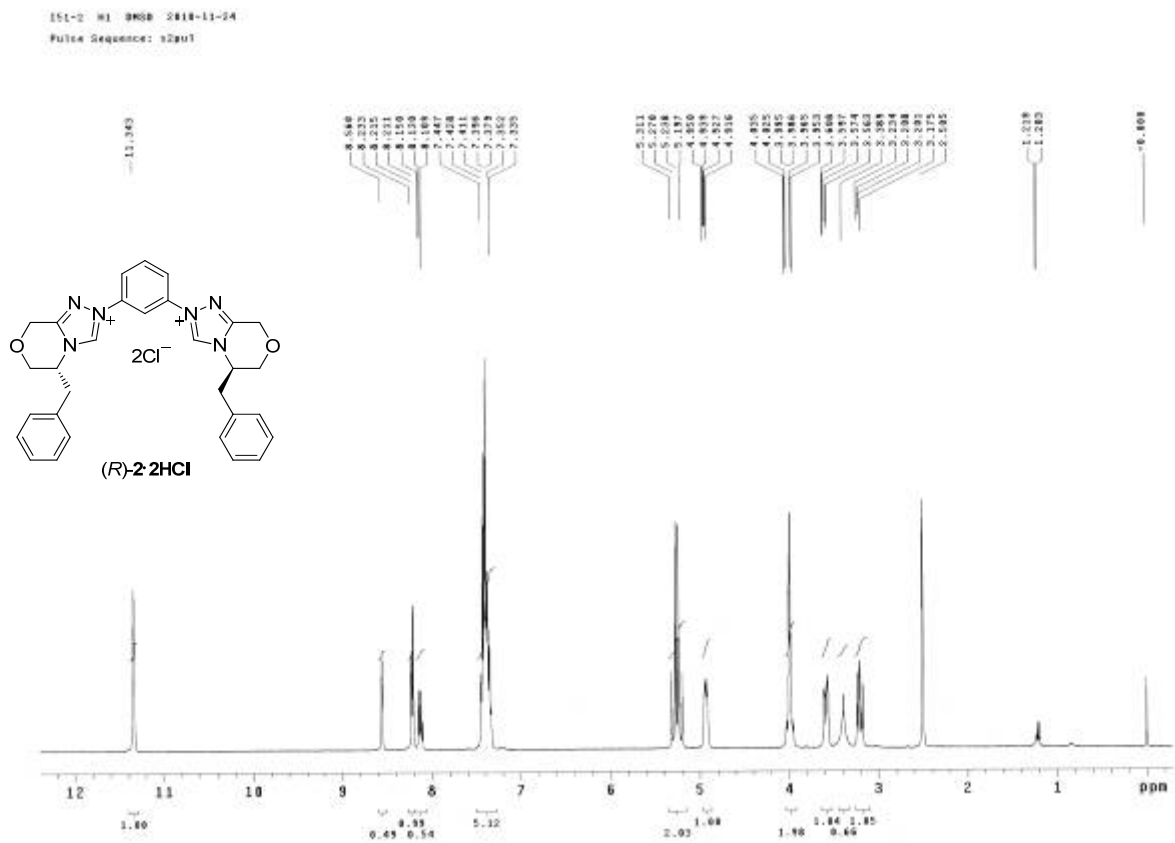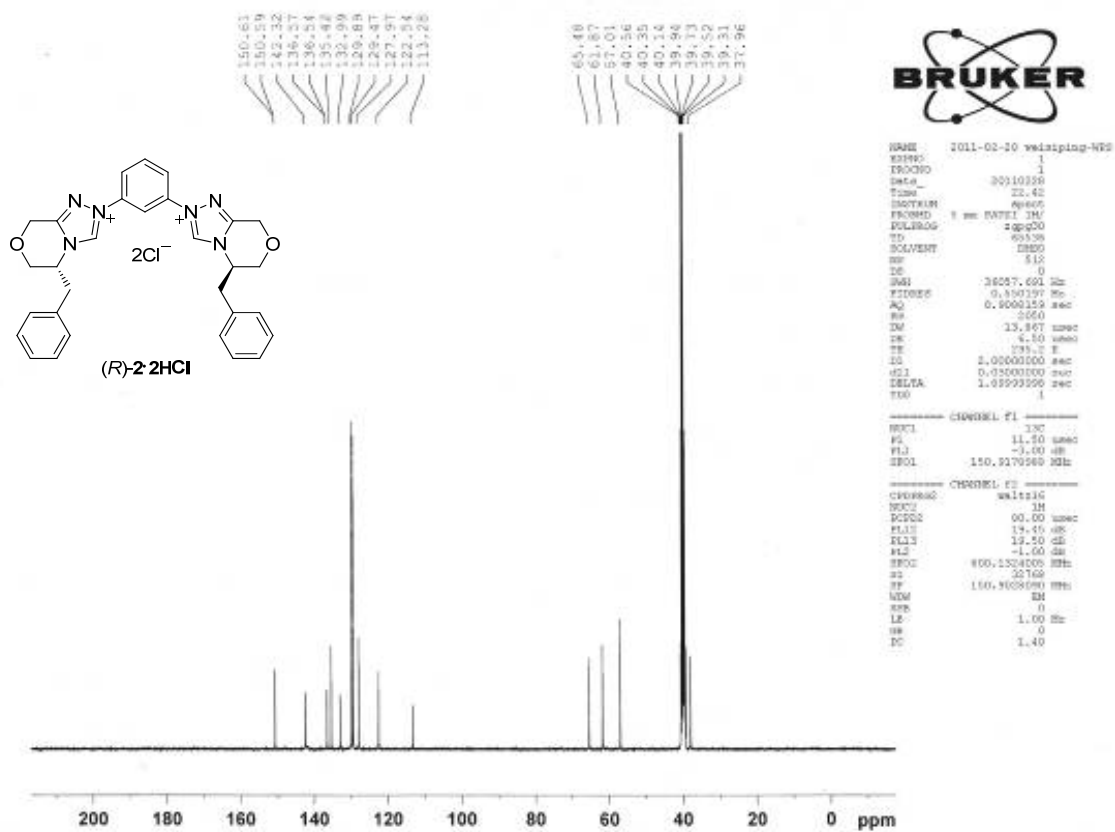

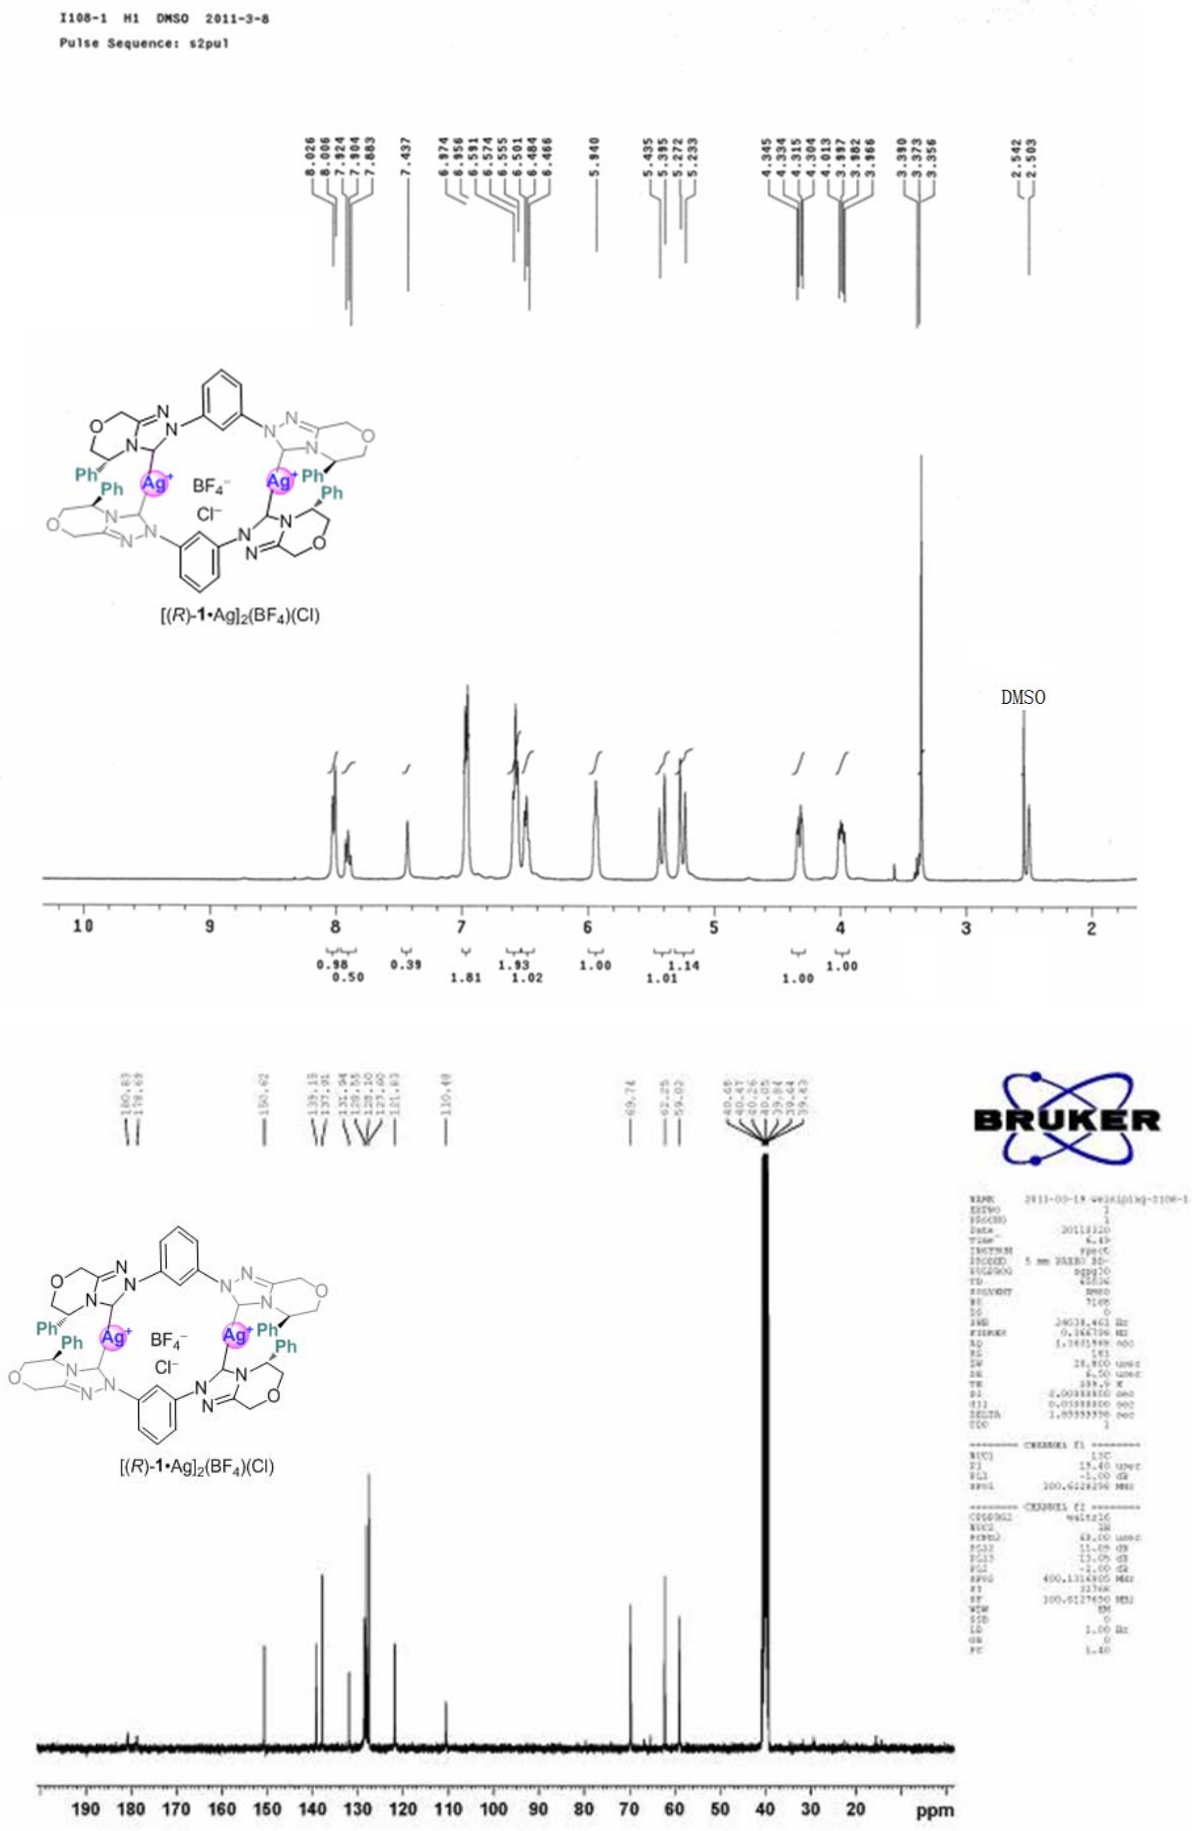

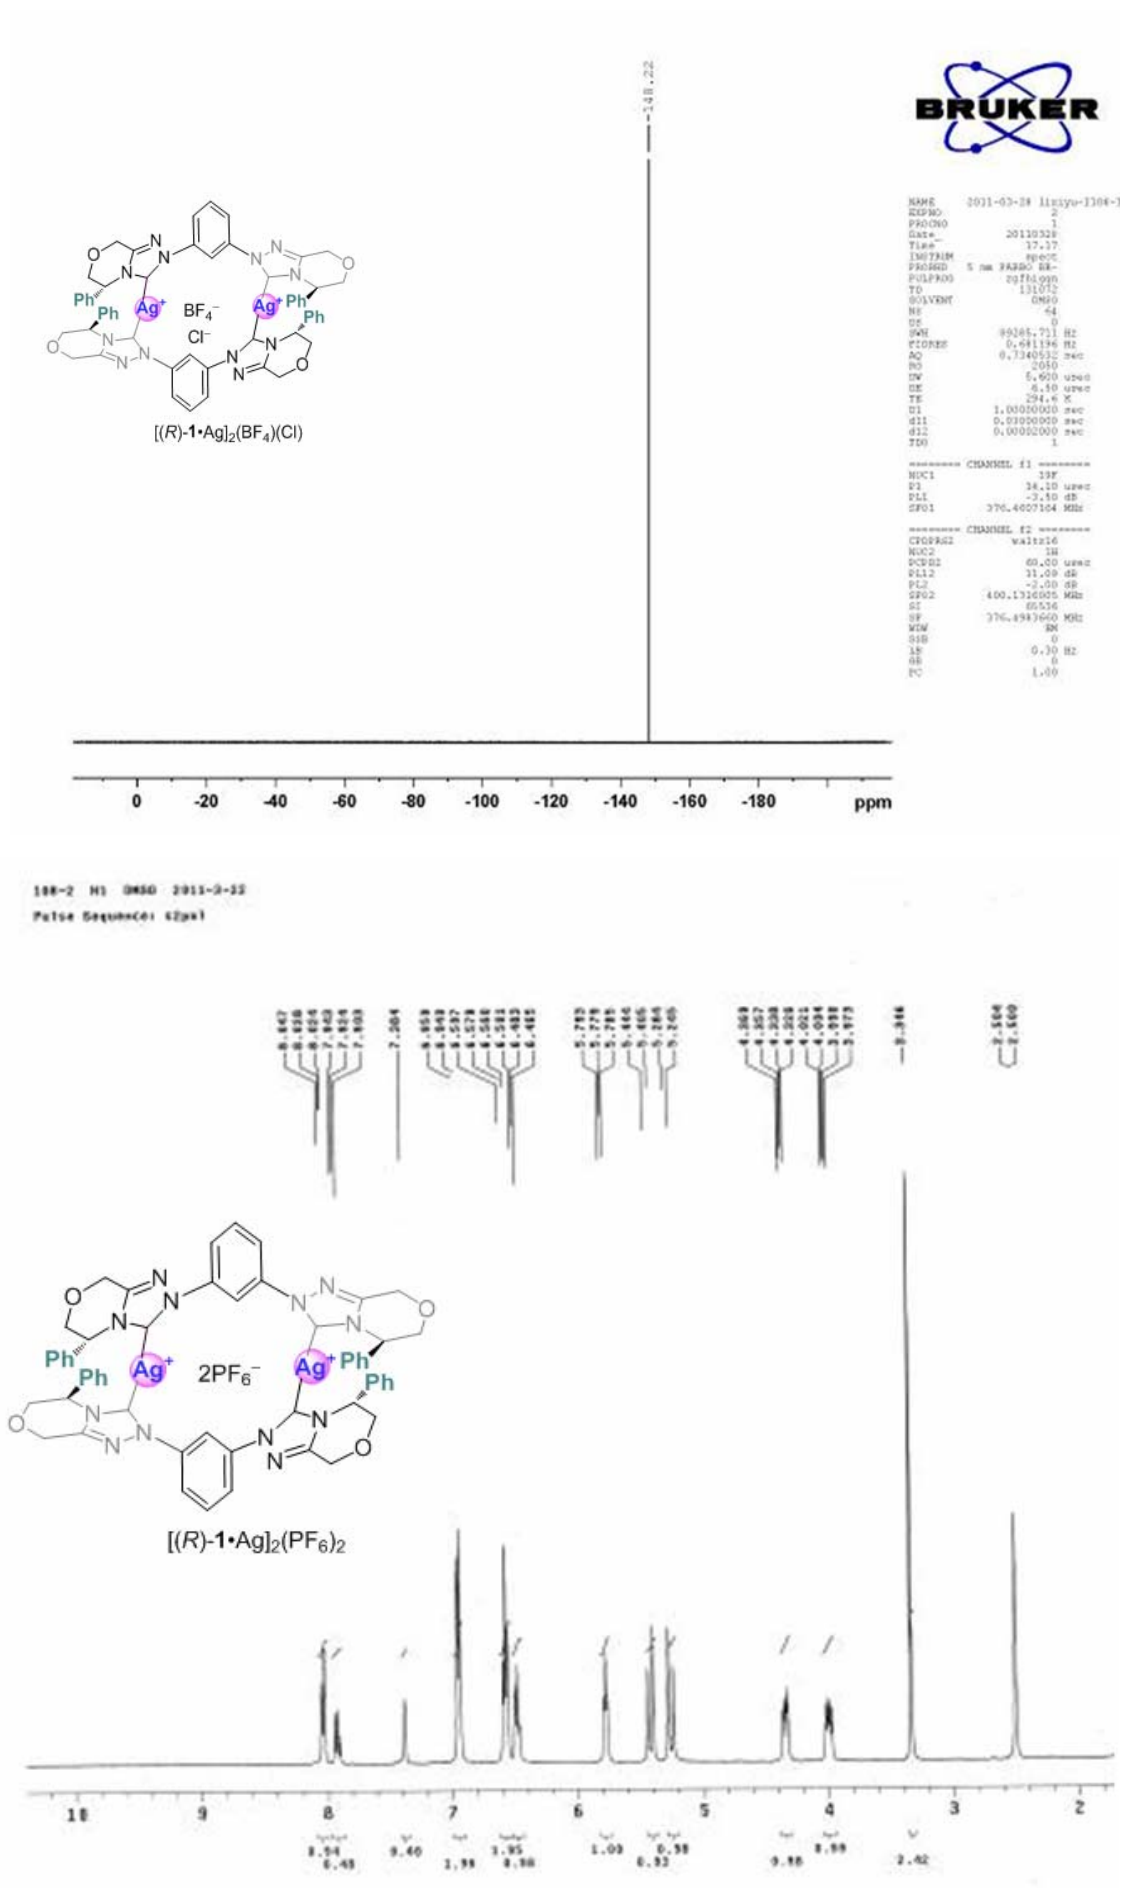

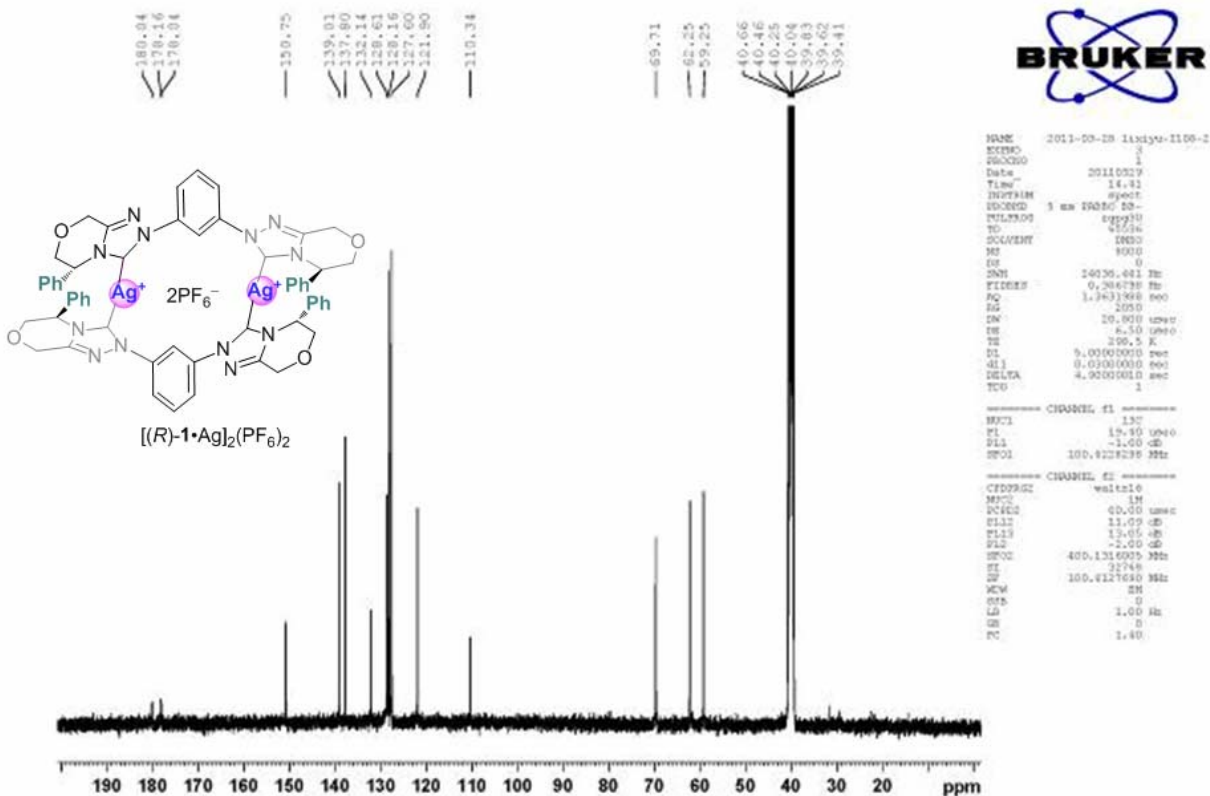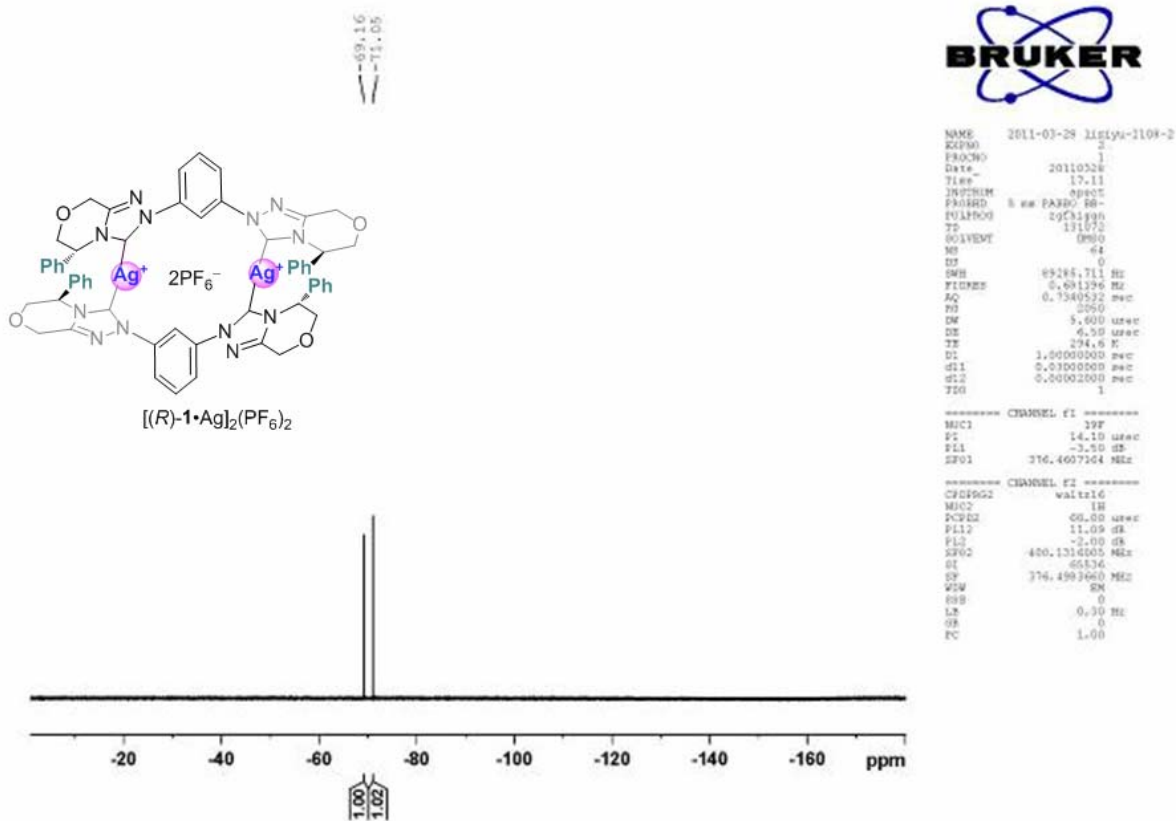

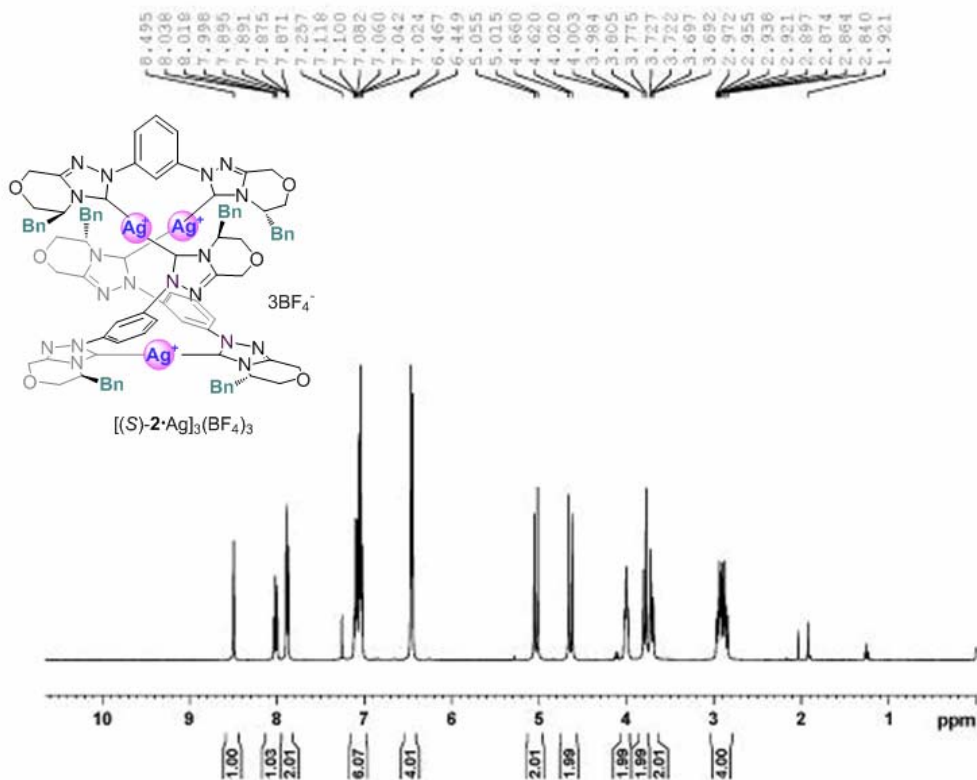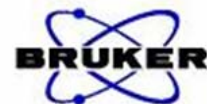

NAME 2011-01-17 lxiyu-177  
EXPNO 2  
PROCNO 1  
Date\_ 20110117  
Time 18.46  
INSTRUM spect  
PROBHD 5 mm PABBO BBO  
PULPROG zgpg30  
TD 65536  
SOLVENT CDCl3  
NS 11  
DS 0  
SWH 8223.695 Hz  
FIDRES 0.125483 Hz  
AQ 1.9846287 sec  
RG 1  
DM 60.800 used  
DE 4.50 used  
TE 300.2 K  
D1 1.00000000 sec  
TD0 1

===== CHANNEL f1 =====  
NUC1 1H  
P1 13.90 used  
PL1 -2.00 dB  
SFO1 400.132410 MHz  
SI 32768  
SF 400.1300108 MHz  
WDW EM  
SSB 0  
LB 0.60 Hz  
GB 0  
PC 1.00

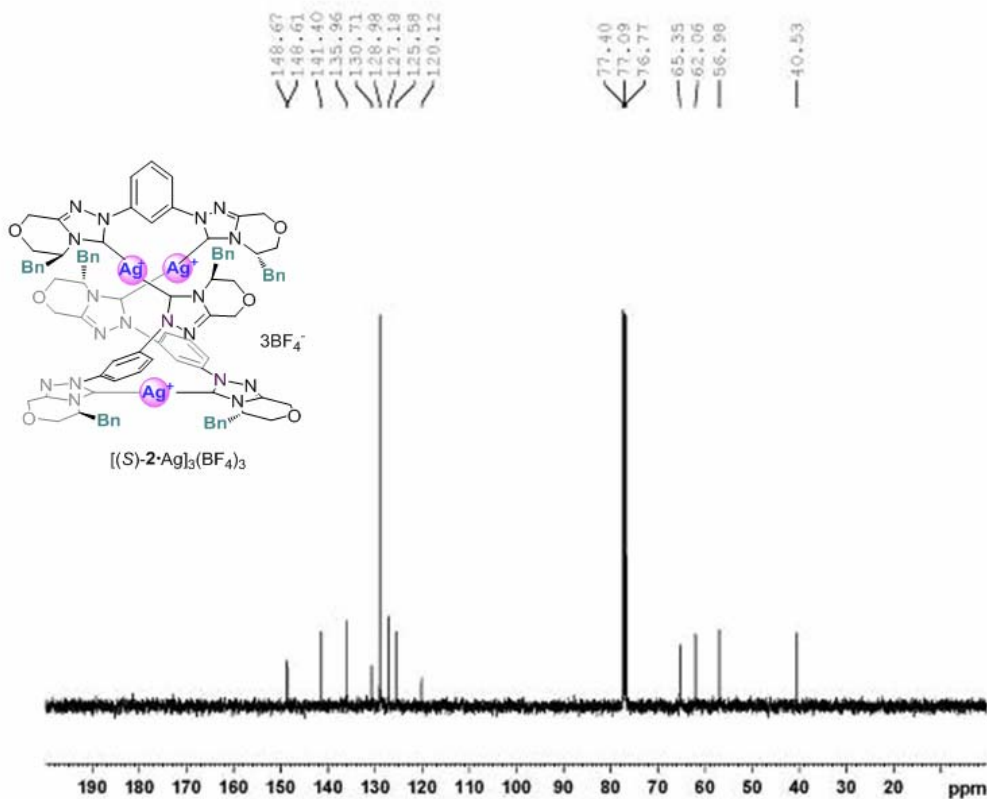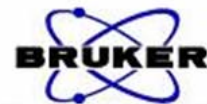

NAME 2011-01-17 lxiyu-177  
EXPNO 1  
PROCNO 1  
Date\_ 20110117  
Time 18.48  
INSTRUM spect  
PROBHD 5 mm PABBO BBO  
PULPROG zgpg30  
TD 65536  
SOLVENT CDCl3  
NS 11  
DS 0  
SWH 24038.461 Hz  
FIDRES 0.184738 Hz  
AQ 1.3431958 sec  
RG 2050  
DM 20.800 used  
DE 6.50 used  
TE 300.1 K  
D1 2.00000000 sec  
d11 0.02000000 sec  
DELTA 2.09999999 sec  
TD0 1

===== CHANNEL f1 =====  
NUC1 13C  
P1 19.40 used  
PL1 -1.00 dB  
SFO1 100.628258 MHz

===== CHANNEL f2 =====  
CPDPRG2 waltz16  
NUC2 1H  
PCPD2 69.00 used  
PL12 11.00 dB  
PL13 13.05 dB  
PL2 -2.00 dB  
SFO2 400.1316005 MHz  
SI 32768  
SF 100.6127690 MHz  
WDW EM  
SSB 0  
LB 2.00 Hz  
GB 0  
PC 1.40

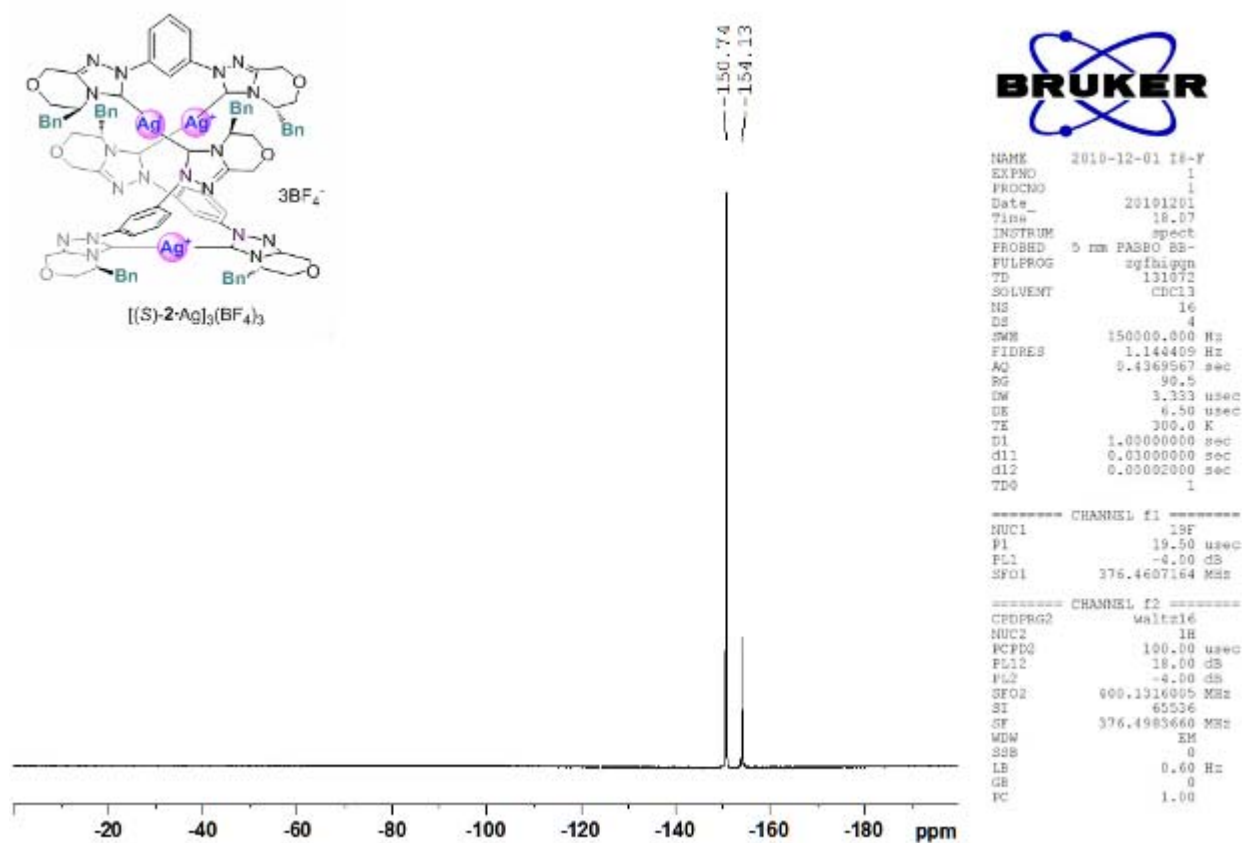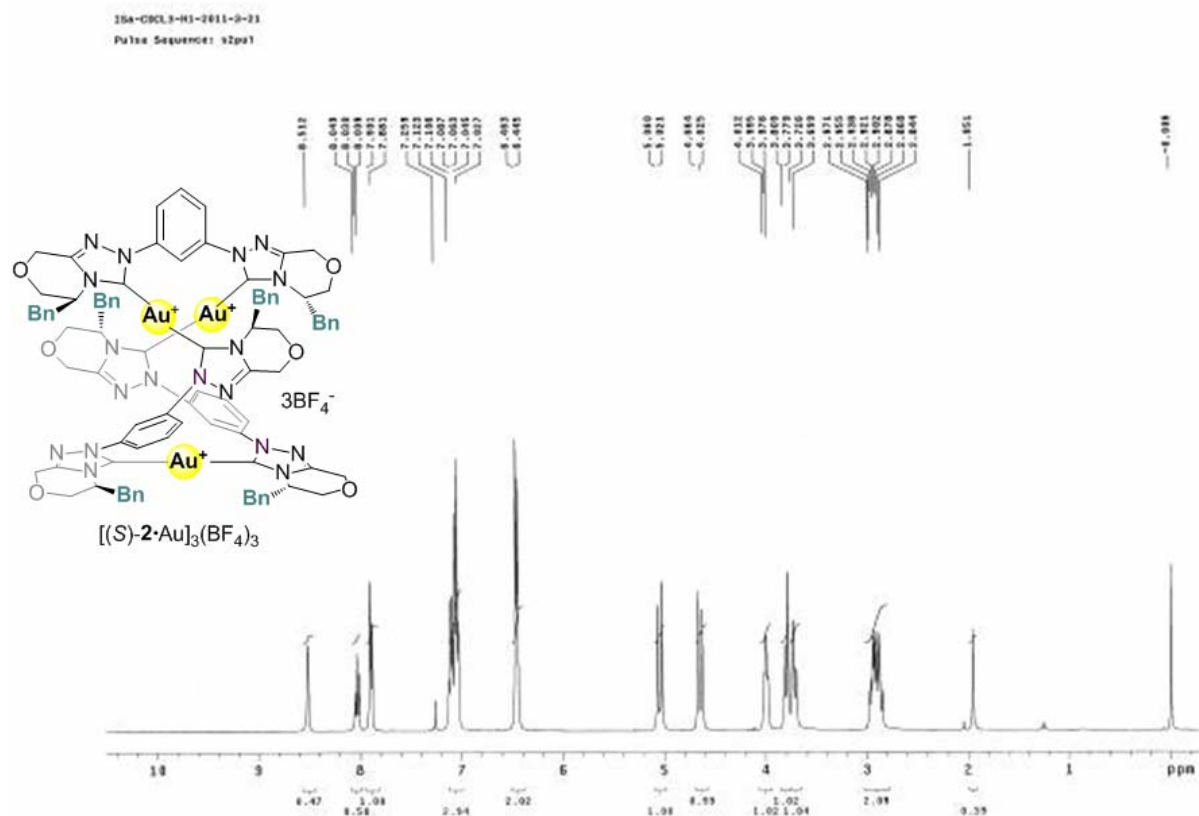

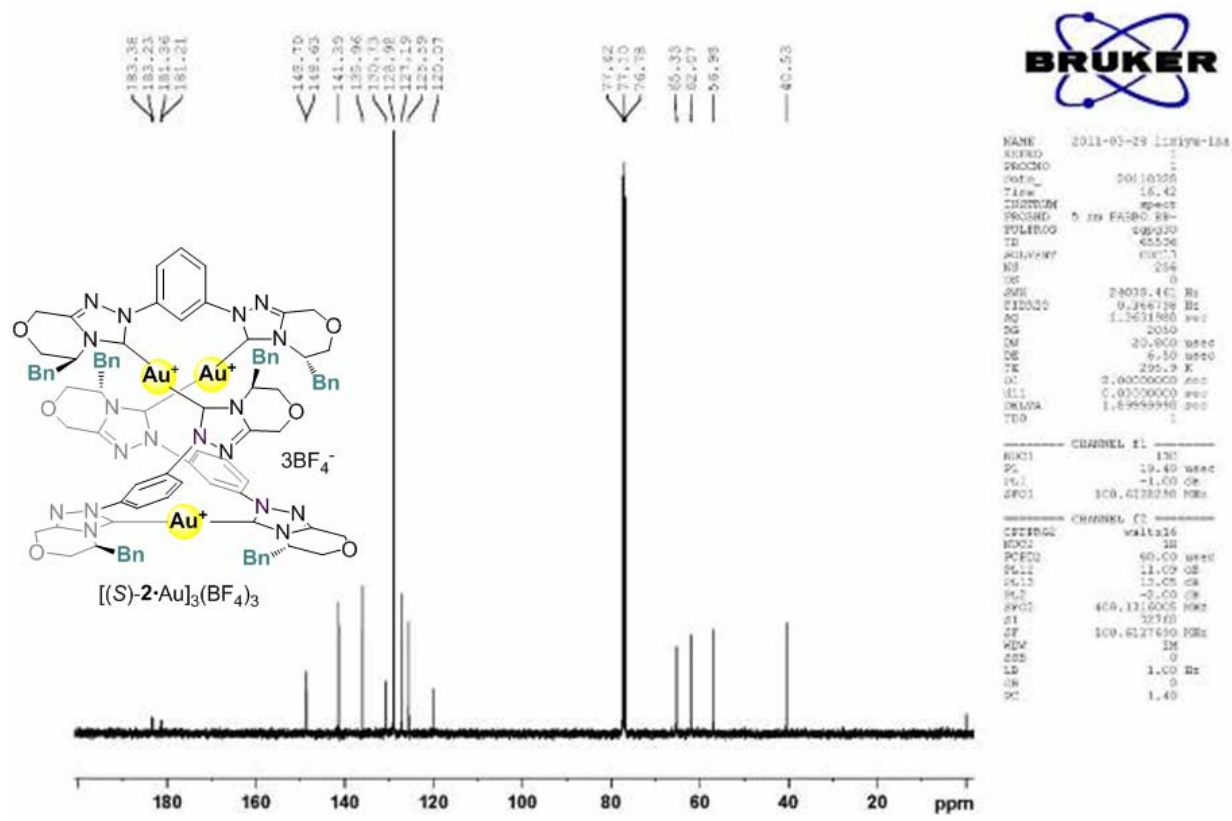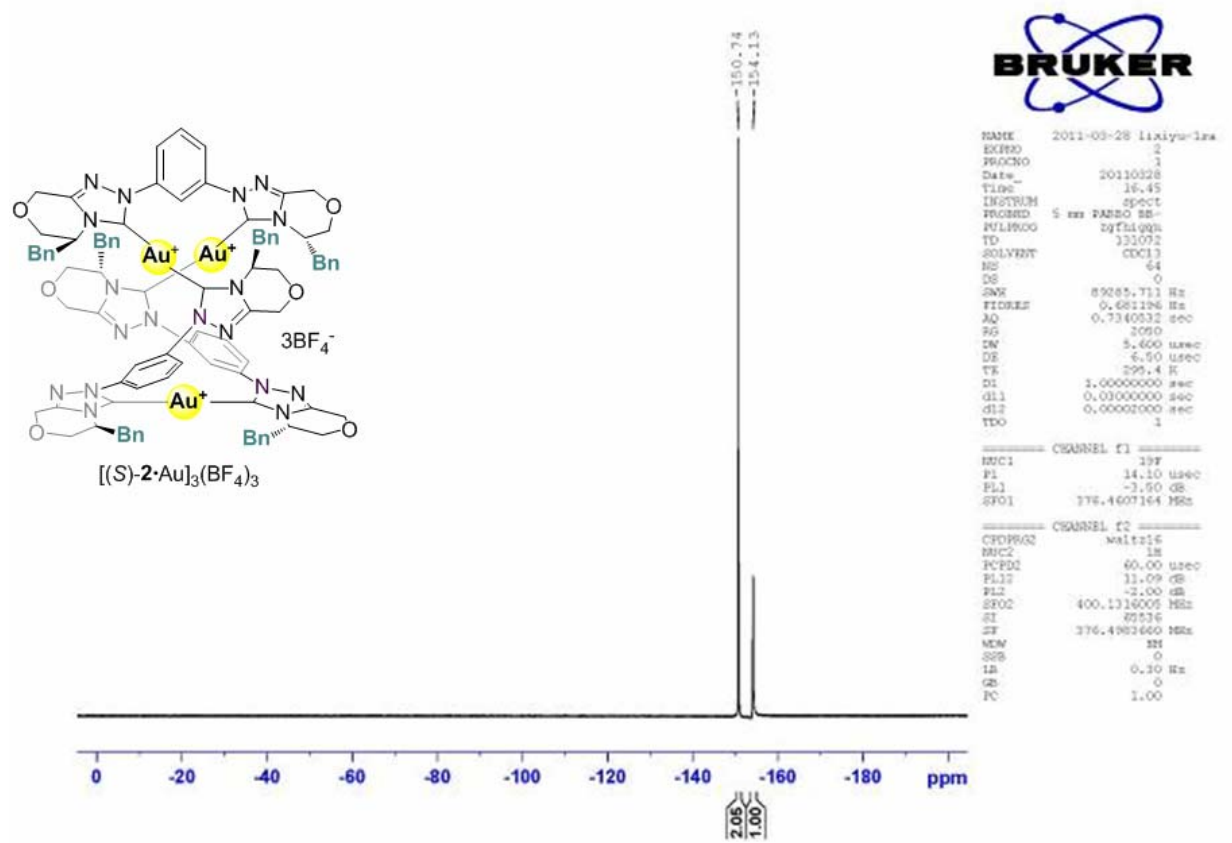

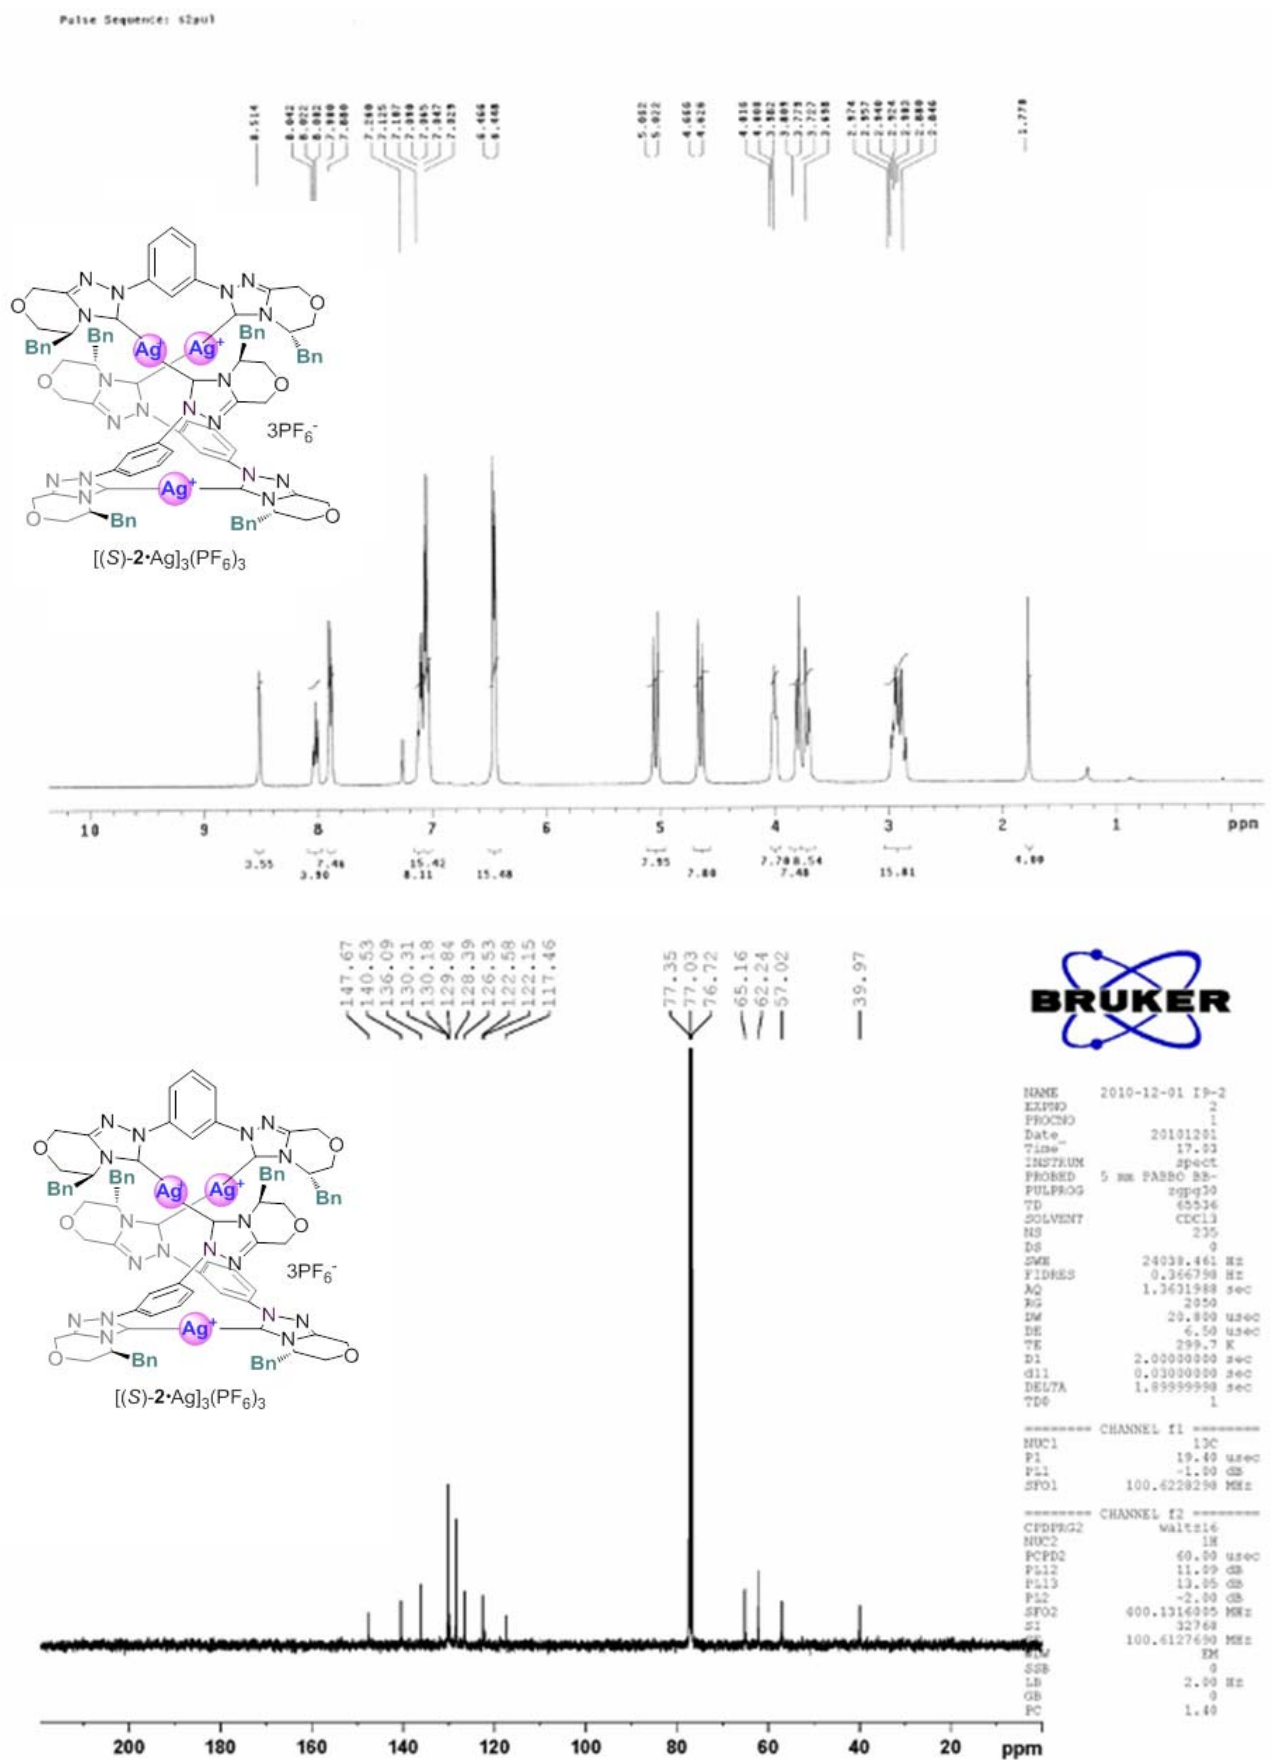

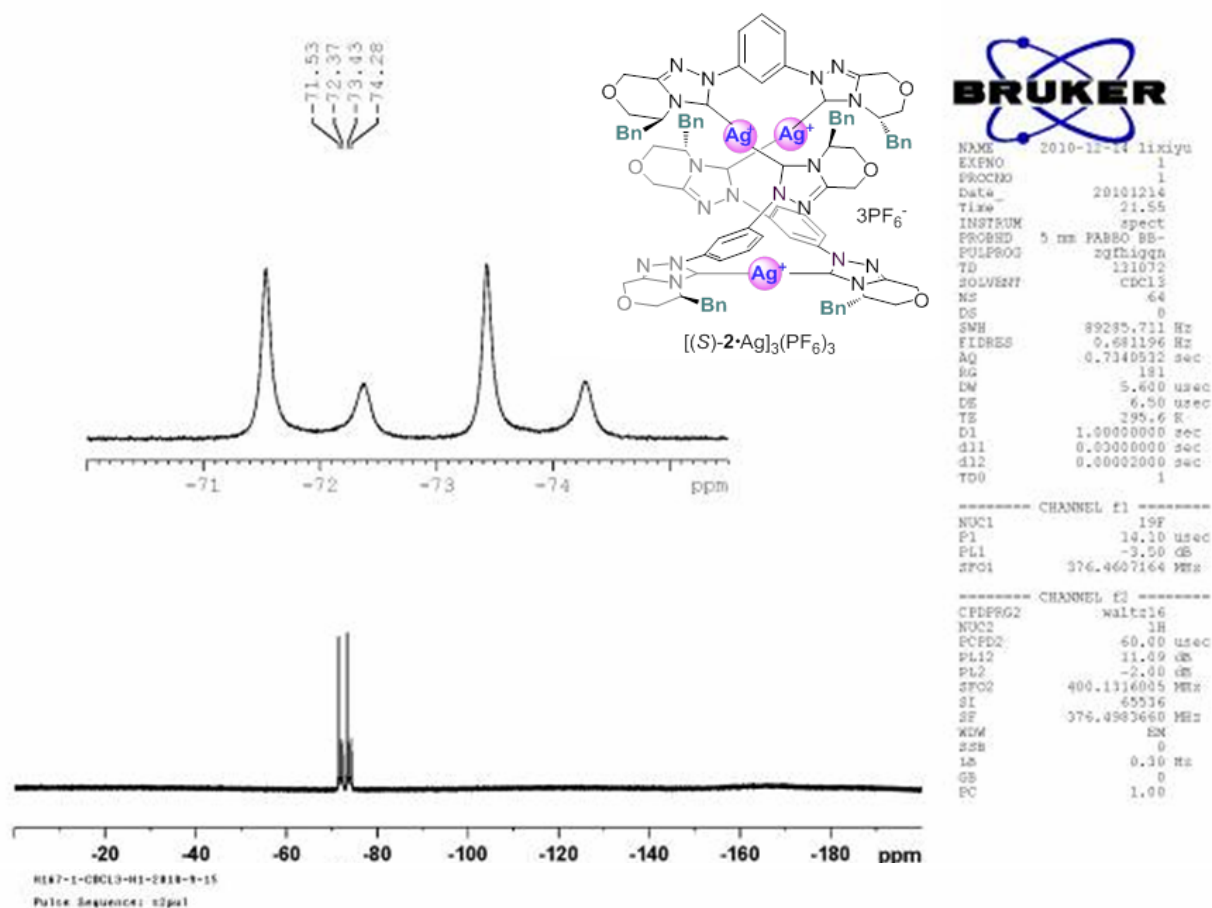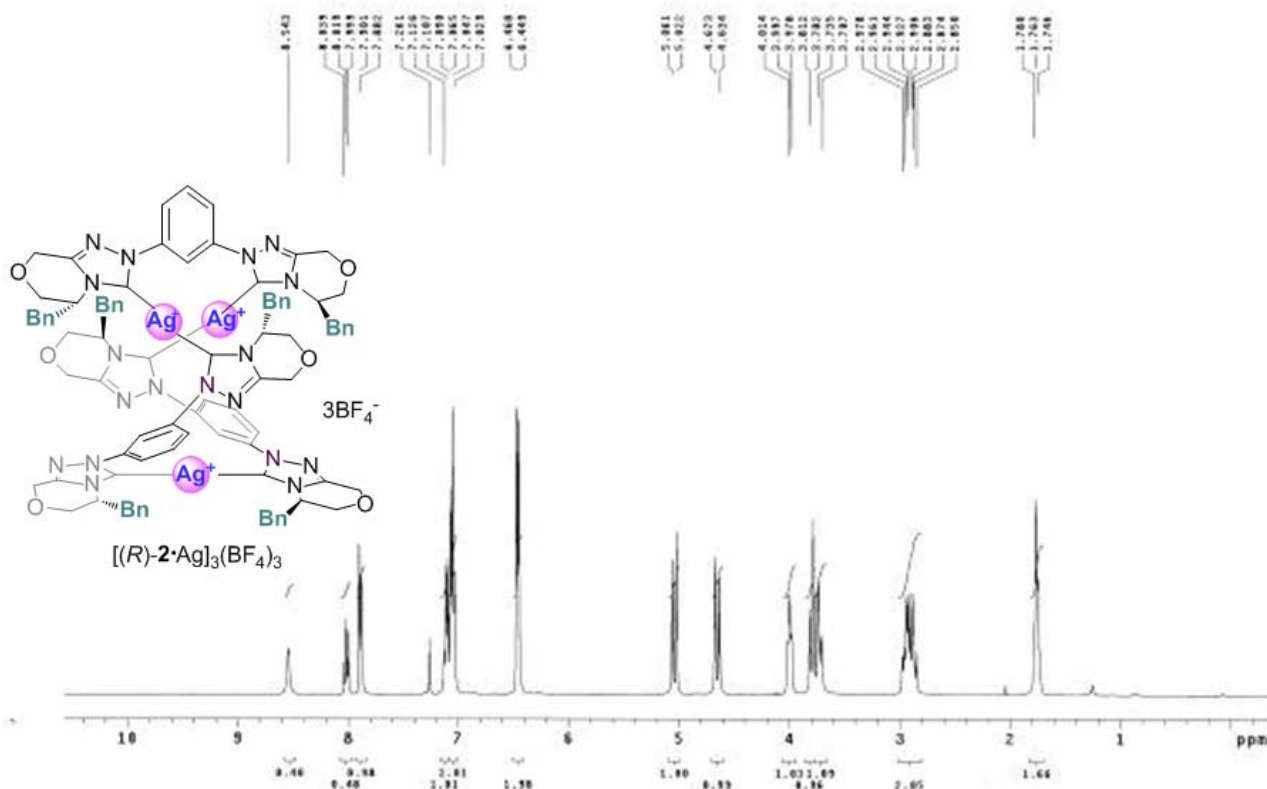

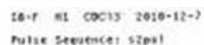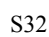

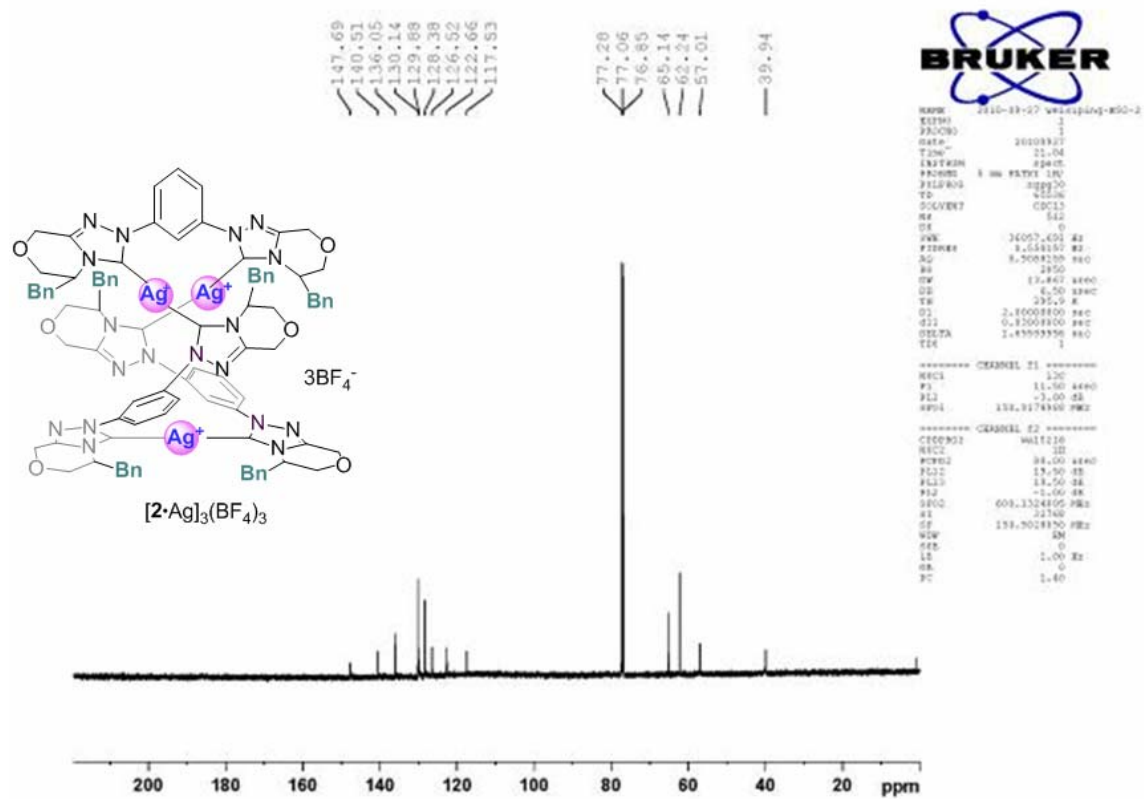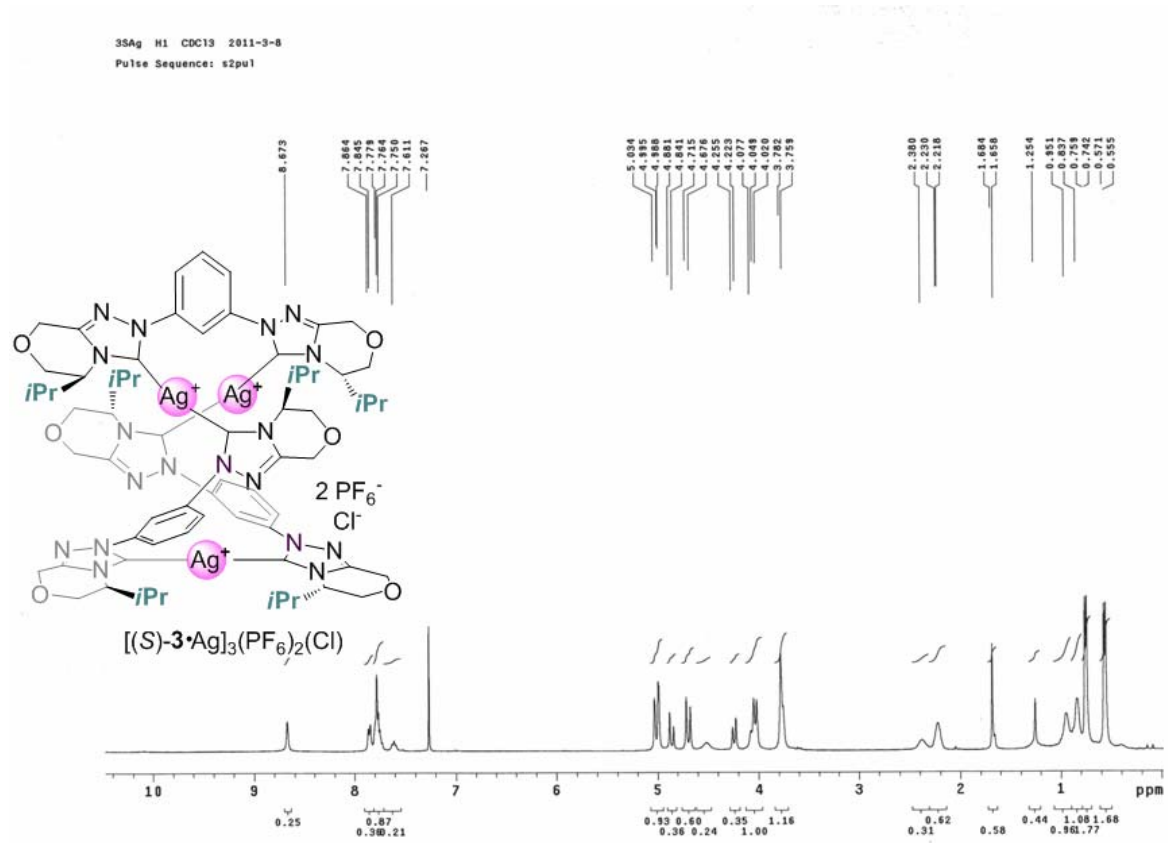

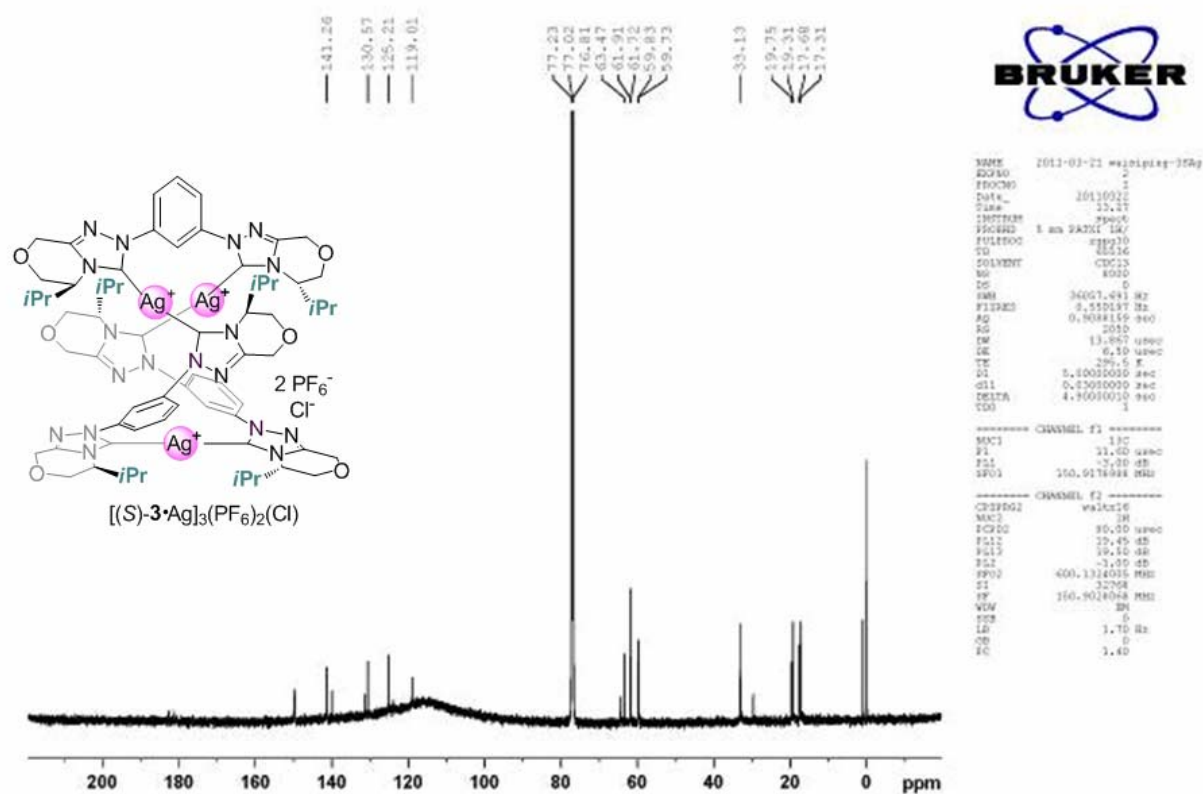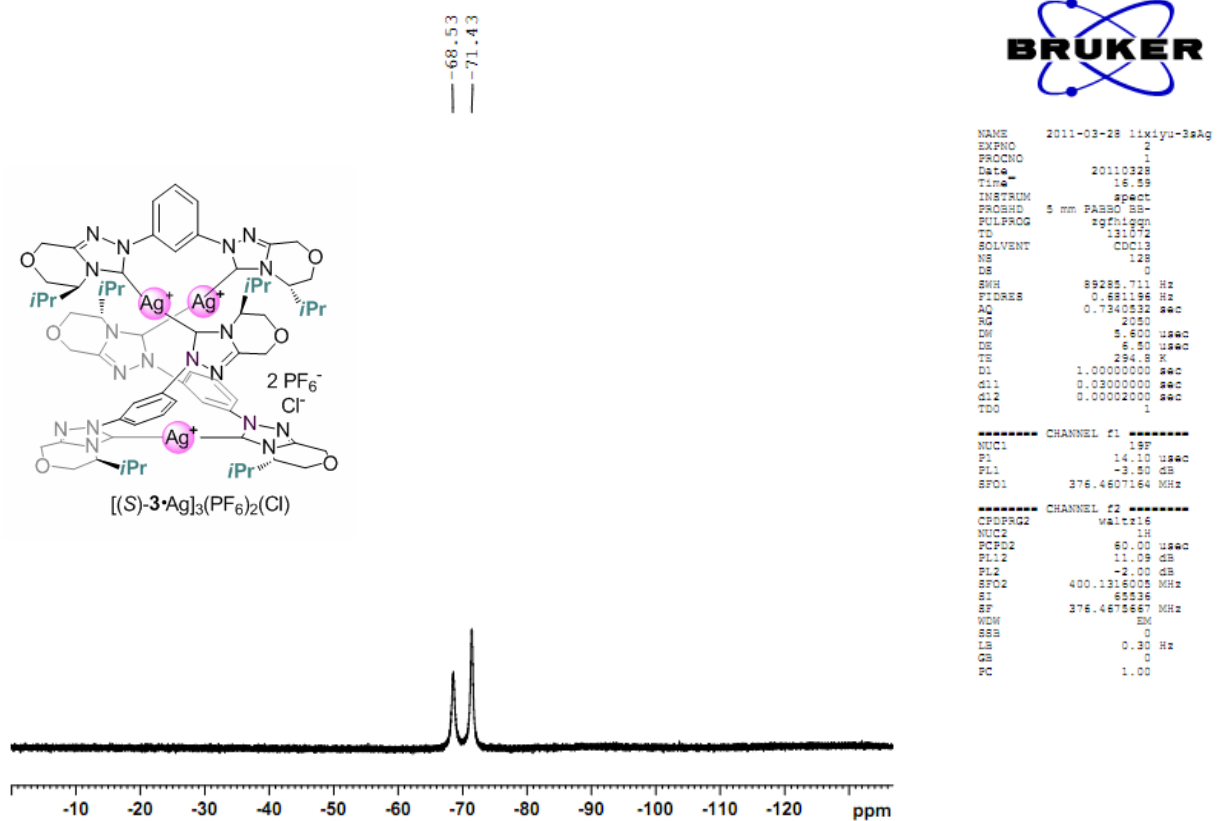

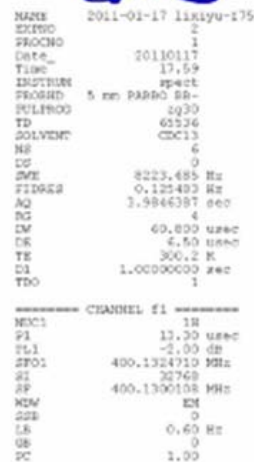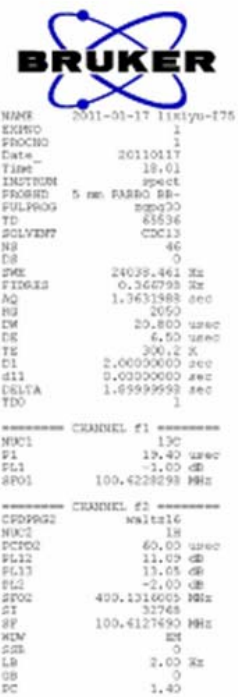

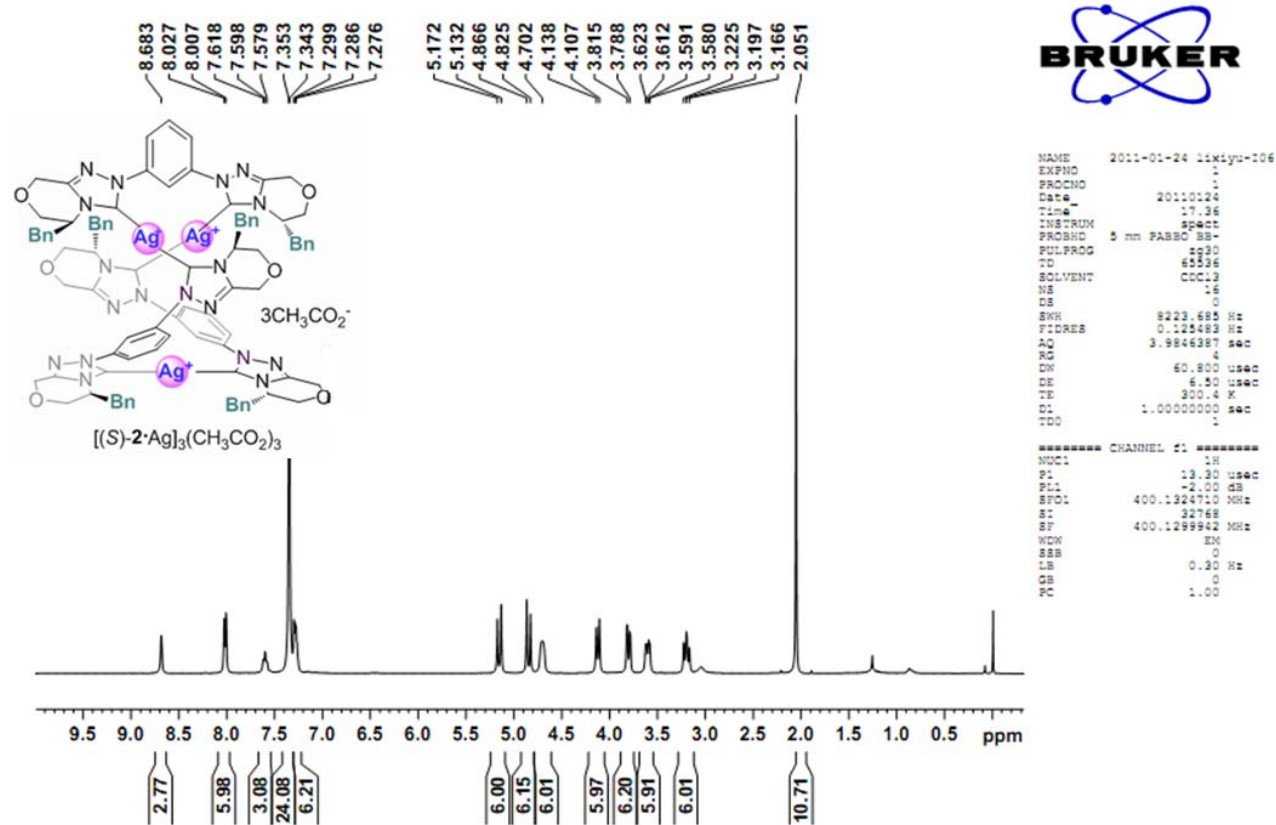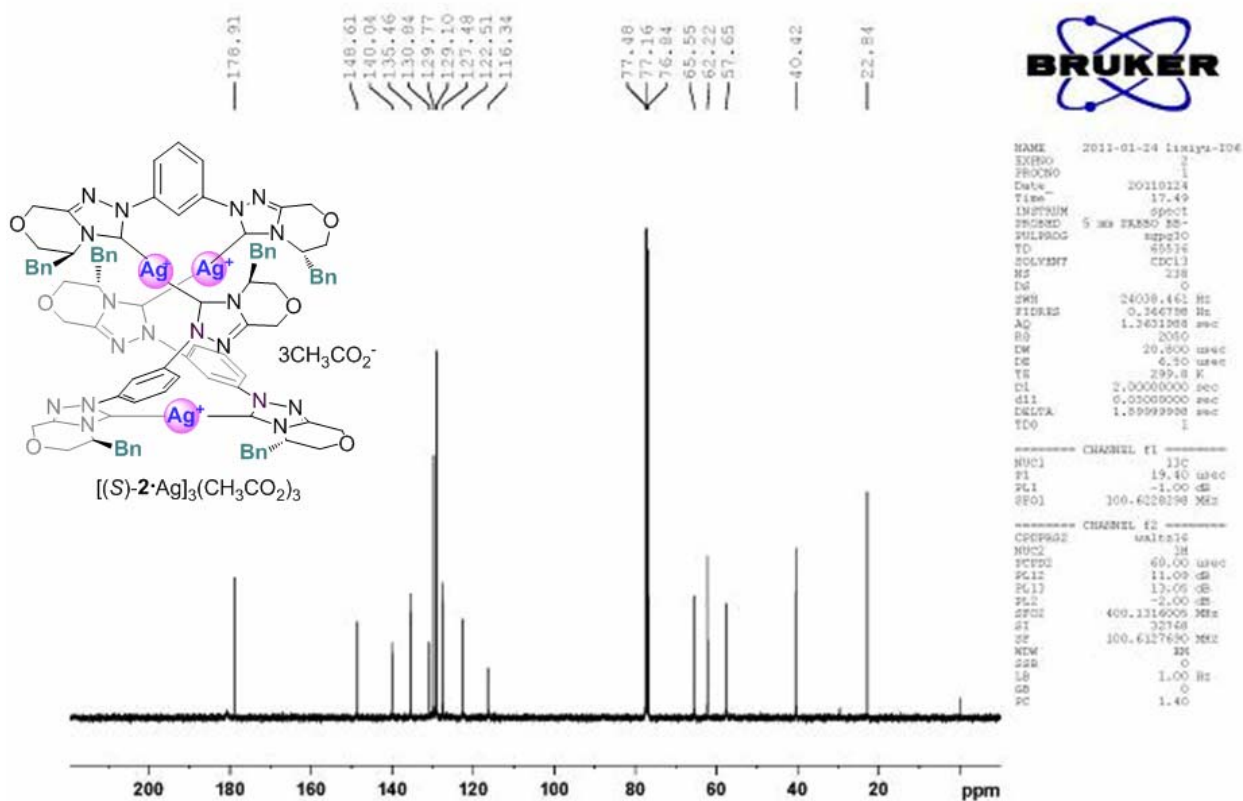

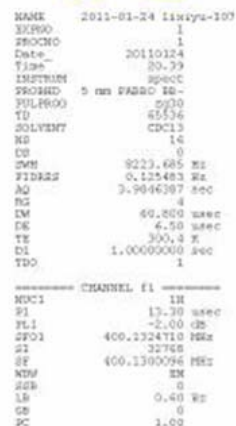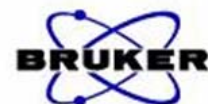

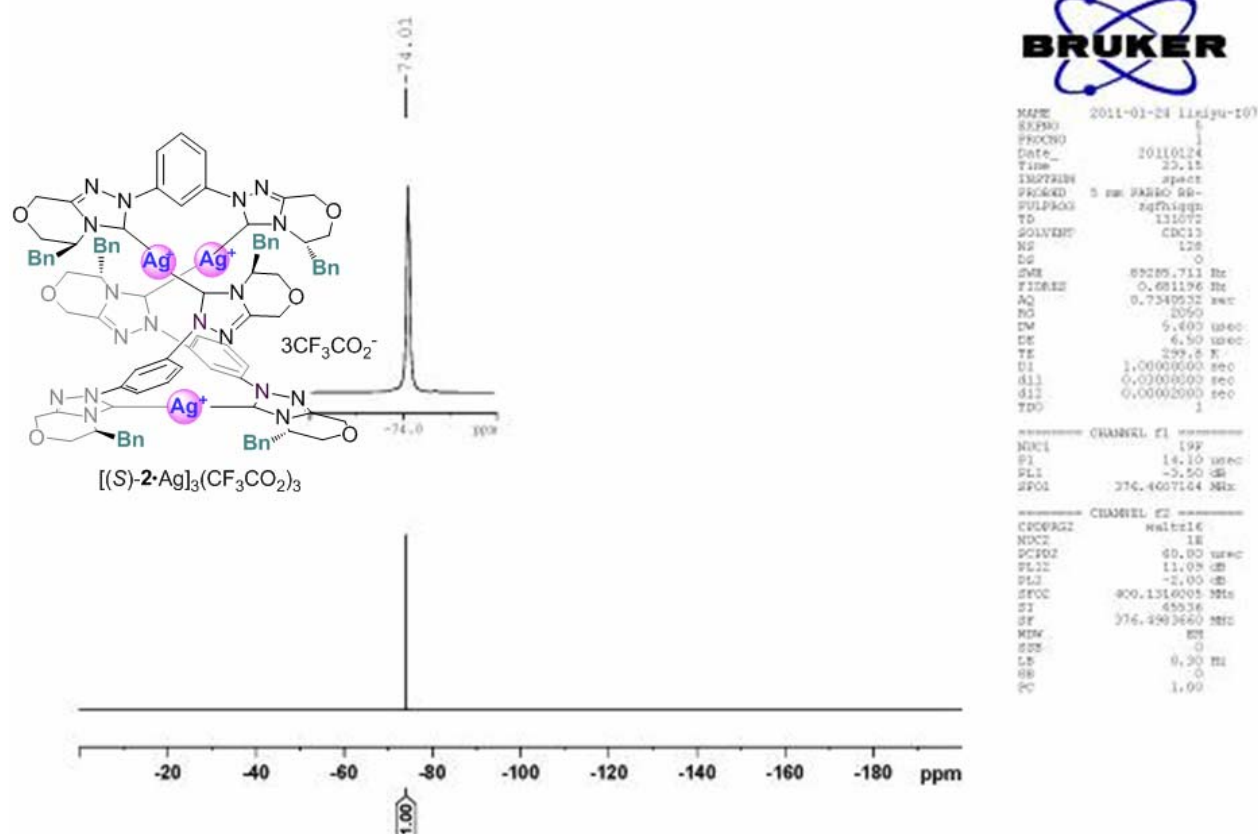

Supplement: c1sc00615k.pdf [file c1sc00615k.pdf]
